# Supplementary material for: Enhancing emotion regulation with an in situ socially assistive robot among LGBTQ+ youth with self-harm ideation: protocol for a randomised controlled trial
Source: PubMed Central journal article supplement (PMC10806609; doi:10.1136/bmjopen-2023-079801), 2024-01-09
Supplement: bmjopen-2023-079801.draft_revisions.pdf [file bmjopen-2023-079801.draft_revisions.pdf]

# BMJ Open

BMJ Open is committed to open peer review. As part of this commitment we make the peer review history of every article we publish publicly available.

When an article is published we post the peer reviewers' comments and the authors' responses online. We also post the versions of the paper that were used during peer review. These are the versions that the peer review comments apply to.

The versions of the paper that follow are the versions that were submitted during the peer review process. They are not the versions of record or the final published versions. They should not be cited or distributed as the published version of this manuscript.

BMJ Open is an open access journal and the full, final, typeset and author-corrected version of record of the manuscript is available on our site with no access controls, subscription charges or pay-per-view fees (<http://bmjopen.bmj.com>).

If you have any questions on BMJ Open's open peer review process please email [info.bmjopen@bmj.com](mailto:info.bmjopen@bmj.com)

# BMJ Open

## Enhancing emotion regulation with an in-situ socially assistive robot among LGBTQ+ youth with self-harm ideation: Protocol for a randomised controlled trial

|                               |                                                                                                                                                                                                                                                                                                                                                                                                                                                                                                                                                                                                                                                                |
|-------------------------------|----------------------------------------------------------------------------------------------------------------------------------------------------------------------------------------------------------------------------------------------------------------------------------------------------------------------------------------------------------------------------------------------------------------------------------------------------------------------------------------------------------------------------------------------------------------------------------------------------------------------------------------------------------------|
| Journal:                      | <i>BMJ Open</i>                                                                                                                                                                                                                                                                                                                                                                                                                                                                                                                                                                                                                                                |
| Manuscript ID                 | bmjopen-2023-079801                                                                                                                                                                                                                                                                                                                                                                                                                                                                                                                                                                                                                                            |
| Article Type:                 | Protocol                                                                                                                                                                                                                                                                                                                                                                                                                                                                                                                                                                                                                                                       |
| Date Submitted by the Author: | 13-Sep-2023                                                                                                                                                                                                                                                                                                                                                                                                                                                                                                                                                                                                                                                    |
| Complete List of Authors:     | Williams, A. Jess; King's College London, Informatics; University of Nottingham, Institute of Mental Health<br>Borschmann, Rohan; Murdoch Childrens Research Institute; University of Oxford<br>Tench, Christopher; University of Nottingham, Division of Clinical Neuroscience<br>Cleare, Seonaid; University of Glasgow<br>Gross, James; Stanford University<br>Hollis, Chris; University of Nottingham, Division of Psychiatry<br>Chapman-Nisar, Amelia; University of Nottingham<br>Naeche, Nkem; University of Nottingham<br>Townsend, Ellen; University of Nottingham, School of Psychology<br>Slovak, Petr; King's College London; University of Oxford |
| Keywords:                     | Suicide & self-harm < PSYCHIATRY, MENTAL HEALTH, Adolescents < Adolescent, Sexual and Gender Minorities, Protocols & guidelines < HEALTH SERVICES ADMINISTRATION & MANAGEMENT, Randomized Controlled Trial                                                                                                                                                                                                                                                                                                                                                                                                                                                     |
|                               |                                                                                                                                                                                                                                                                                                                                                                                                                                                                                                                                                                                                                                                                |

SCHOLARONE™  
Manuscripts

1  
2  
3  
4  
5  
6  
7  
8  
9  
10  
11  
12  
13  
14  
15  
16  
17  
18  
19  
20  
21  
22  
23  
24  
25  
26  
27  
28  
29  
30  
31  
32  
33  
34  
35  
36  
37  
38  
39  
40  
41  
42  
43  
44  
45  
46  
47  
48  
49  
50  
51  
52  
53  
54  
55  
56  
57  
58  
59  
60

# Enhancing emotion regulation with an in-situ socially assistive robot among LGBTQ+ youth with self-harm ideation: Protocol for a randomised controlled trial

A. Jess Williams\*, Rohan Borschmann, Christopher Tench, Seonaid Cleare, James J Gross, Chris Hollis, Amelia Chapman-Nisar, Nkem Naeche, Ellen Townsend, Petr Slovak

\*Corresponding author: amy\_jess.williams@kcl.ac.uk

Informatics,

Bush House

Strand Campus

King's College London

## Abstract:

**Introduction:** Purrble, a socially assistive robot, was co-designed with children to support in-situ emotion regulation. Preliminary evidence has found that LGBTQ+ youth are receptive to Purrble and find it to be an acceptable intervention to assist with emotion dysregulation and their experiences of self-harm. The present study is designed to evaluate the impact of access to Purrble among LGBTQ+ youth who have self-harmful thoughts, when compared to waitlist controls.

**Methods and analysis:** The study is a single-blind, randomised control trial comparing access to the Purrble device with waitlist control. A total of 168 LGBTQ+ youth aged 16-25 years with current self-harmful ideation will be recruited, all based within the UK.

The primary outcome is emotion dysregulation (Difficulties with Emotion Regulation Scale-8) measured weekly across a 13-week period, including 3 pre-deployment timepoints. Secondary outcomes include self-harm (Self-Harm Questionnaire), anxiety (Generalised Anxiety Disorder-7), and depression (Patient Health Questionnaire-9). We will conduct analyses using linear mixed models to assess primary and secondary hypotheses.

1  
2  
3  
4 After the study has ended, a subset of participants will be invited to participate in semi-  
5 structured interviews to explore engagement and appropriation of Purrble, considering the  
6 young people's own views of Purrble as an intervention device.  
7  
8  
9

10 **Ethics and dissemination:** Ethical approval was received from King's College London  
11 (RESCM-22/23-34570). Findings will be disseminated in peer review open-access journals  
12 and at academic conferences.  
13  
14

15  
16 **Trial registration number:** Clinical trial gov: NCT06025942  
17  
18

## 19 Strengths and limitations of this study

- 20  
21 - This is the first randomised controlled trial to explore the impact of access of Purrble,  
22 a socially assistive robot, compared to waitlist control on emotion regulation  
23 difficulties within LGBTQ+ youth who have current experiences of self-harmful  
24 ideation.
- 25  
26 - Purrble was co-designed with youth to support emotion regulation in-situ.
- 27  
28 - The study was co-designed with young people who have experience of mental health  
29 difficulties (Sprouting Minds), including a detailed safeguarding procedure.
- 30  
31 - Participants will not be blinded to participant group due to the nature of the  
32 intervention.

## 33 Introduction

34  
35  
36 Self-harm, defined as the intentional poisoning or injury of self, irrespective of intention [1], is  
37 a key health concern among sexual orientation and/or gender identity minorities, LGBTQ+  
38 populations [2]. Internationally, young LGBTQ+ people report higher prevalence of self-  
39 harmful thoughts and behaviours, anxiety, depression, and substance misuse when  
40 compared to their cisgender, heterosexual peers [3-8] It is well documented that those with a  
41 history of self-harm are at greater risk of suicide [9], and recent evidence indicates that  
42 LGBTQ+ youth are 3-6 times more likely attempt suicide than their cisgender, heterosexual  
43 counterparts [10-11]. Despite the considerable risk of self-harm and associated adverse  
44 outcomes [12-13], there is a lack of evidence-based interventions to support LGBTQ+ youth  
45 struggling with self-harmful thoughts and behaviours.  
46  
47  
48  
49  
50  
51  
52  
53  
54  
55

56 Youth who self-harm often do not seek professional help [14-15], and those that do find  
57 services (e.g., Child and Adolescent Mental Health Services, Accident and Emergency or  
58 social services) to be less helpful sources of support [16] or rarely re-attend services [17].  
59  
60

1  
2  
3  
4 Factors relating to this can include negative attitudes and behaviours/treatment from health  
5 care staff (e.g., withdrawing pain-reducing medication for wound treatment [18]), concerns  
6 about confidentiality [19], or perceived stigma surrounding self-harm [20-21]. Among  
7  
8 LGBTQ+ people, help-seeking is even more complex, with one in seven avoiding services  
9  
10 due to fears of discrimination on the basis of their sexual orientation or gender identity [22].  
11  
12 Therefore, community-based interventions may be more appropriate to support LGBTQ+  
13  
14 youth engaging in self-harm.  
15  
16

17  
18 As LGBTQ+ youth are frequent users of digital technologies [23-26], there is an opportunity  
19  
20 for digital interventions to support those struggling with self-harm and other mental health  
21  
22 difficulties. Evidence suggests that digital interventions support youth to bypass various  
23  
24 barriers to help-seeking, such as lack of accessibility, anticipated stigma, inadequate  
25  
26 resources, and the desire to be self-reliant [27], which are compounded by unique  
27  
28 challenges facing LGBTQ+ youth (e.g. concerns about experiencing stigma or discrimination  
29  
30 as a minority [28]).  
31  
32

33 At present, the field concerning digital interventions among LGBTQ+ youth is small, yet  
34  
35 those available are perceived as feasible, acceptable, and relatively effective [29]. However,  
36  
37 most focus on physical health such as risk reduction or management of sexually transmitted  
38  
39 illnesses (STIs; [29]), with few concerning mental wellbeing [30-33]. These mental health  
40  
41 interventions are typically perceived positively by LGBTQ+ youth [30, 32-34], with mixed  
42  
43 findings reported by the three considering the impact of the intervention on participants at  
44  
45 this stage; 1) Rainbow SPARX [32]; 2) an online writing intervention [31]; and 3) QueerViBE  
46  
47 [30]. In their pilot trial, Rainbow SPARX (a didactic PC game using Cognitive Behaviour  
48  
49 Therapy principles) was associated with large reduction for depressive ( $d=1.01$ ) and anxious  
50  
51 ( $d=0.95$ ) symptoms [32]. Whereas, QueerViBE (a series of brief, interactive videos designed  
52  
53 for transgender and gender diverse youth) found a moderate decrease in psychological  
54  
55 distress ( $d=0.63$ ) when compared to the control group [30]. However, the expressive writing  
56  
57 intervention demonstrated no difference in depressive symptoms in their randomised  
58  
59 controlled trial [31]. Therefore, while limited, digital interventions are feasible, acceptable and  
60  
potentially effective for improving mental health among LGBTQ+ youth. However, there are

1  
2  
3 currently no evidence-based digital interventions targeting LGBTQ+ youth who struggle with  
4 self-harm.  
5  
6  
7

8  
9 Whilst self-harm among LGBTQ+ youth can be associated with multiple risks, complex  
10 experiences, and unique stressors [35-37], a common issue is often emotional dysregulation  
11 [38-41]. Emotion regulation (ER) is a well-known transdiagnostic risk factor [42-44], which  
12 can be associated with higher risk of self-harm across ages, settings, and genders [45-46].  
13 Typically, LGBTQ+ populations report greater difficulties with ER [40-41], which explains in  
14 part the association between LGBTQ+ identity and self-harm [40-41]. Examining how ER  
15 can be better supported in young LGBTQ+ people who self-harm through digital intervention  
16 may be a helpful preventative strategy to aid LGBTQ+ youth broadly.  
17  
18  
19  
20  
21  
22  
23

24  
25 To address this, a pilot study was conducted with LGBTQ+ youth who had recent  
26 experiences of self-harmful thoughts and/or behaviours using an in-situ, emotion regulation  
27 intervention tool, Purrble [47], designed to provide in-the-moment support see Intervention  
28 section for further details. Purrble was originally developed for children in moments of  
29 situated distress, but has been well-accepted across child and student populations delivering  
30 notable benefits for emotion regulation [47-50]. Among a small sample of 21 LGBTQ+ young  
31 people, Purrble was found to be a feasible and acceptable intervention with continued device  
32 engagement across a 2-week deployment [47]. Notably, access to Purrble was also  
33 associated with a reduction in anxiety symptoms and self-harmful thoughts. Qualitative data  
34 indicated that this was linked to Purrble supporting ER practices (e.g., grounding, soothing)  
35 to prevent young people acting on their self-harmful urges and, in some cases, preventing  
36 them from considering self-harm at all [47]. Based on these findings, and Purrble's original  
37 design to support in-situ, bottom-up ER [48-49], it appears that mental health outcomes such  
38 as anxiety and self-harm [47, 50] are guided by the proximal change in emotion regulation.  
39  
40  
41  
42  
43  
44  
45  
46  
47  
48  
49  
50  
51

52  
53 Although these early data are promising, there is a lack of robust quantitative data on the  
54 impact of the intervention in a wider sample of LGBTQ+ young people who have self-  
55 harmed. Evidence is therefore urgently needed to evaluate the efficacy of Purrble in a)  
56  
57  
58  
59  
60

delivering measurable changes in ER when compared to a control group, and b) the extent to which this impacts the frequency of self-harmful thoughts and/or anxiety symptoms.

## Study objectives

**Primary Objective:** The primary objective of this study is to evaluate the impact of having access to the Purrble intervention, compared with a waitlist control, on emotion regulation difficulties (DERS8) among LGBTQ+ young people with self-harmful thoughts.

**Secondary Objectives:** The secondary objectives are i) to investigate the impact of having access to Purrble on changes to LGBTQ+ young people's self-harmful thoughts over the trial period, in comparison to a waitlist control group; and ii) to investigate the impact of Purrble on changes in symptoms of anxiety (GAD-7), and symptoms of depression (PHQ-9) over the trial period, in comparison to waitlist controls. Finally, this will be the first opportunity to assess whether Purrble remains appealing and helpful to LGBTQ+ youth over an extended period.

## Methods

### Trial design

The study is a 2-arm randomised controlled trial comparing an intervention group (Purrble) with a waitlist control group. The trial period is across 13 weeks, built of 3 pre-deployment assessments and 10 deployment assessments, using weekly, self-reported, validated surveys (see table 1). The intervention period will commence once Purrble has been deployed to the intervention group, week 4 (T1). After the deployment period, the intervention participants will be able to keep their Purrble devices, and the waitlist control participants will be sent Purrble devices.

**Table 1: Overview of assessment design for both participant groups**

| Surveys | Pre-deployment<br>(week 1-3) | Deployment<br>(week 4-13) | Follow-up<br>(week 13+) |
|---------|------------------------------|---------------------------|-------------------------|
|---------|------------------------------|---------------------------|-------------------------|

|                               | T(-2) | T(-1) | T(0) | T1 | T2 | T3 | T4 | T5 | T6 | T7 | T8 | T9 | T10 |
|-------------------------------|-------|-------|------|----|----|----|----|----|----|----|----|----|-----|
| Register interest + screening | X     |       |      |    |    |    |    |    |    |    |    |    |     |
| Consent                       | x     |       |      |    |    |    |    |    |    |    |    |    |     |
| Main assessment               | x     | x     |      | x  | x  | x  | x  |    | x  | x  | x  | x  |     |
| Extended assessment           |       |       | x    |    |    |    |    | x  |    |    |    |    | x   |
| Qualitative interviews        |       |       |      |    |    |    |    |    |    |    |    |    | x   |

Analyses will be conducted and reported in accordance with the Consolidated Standards of Reporting Trials (CONSORT; [51]), with consideration given to the recommendation of psychological interventions [52]. Outcomes will be assessed 13 times across a 13-week period, including 3 baseline assessments and 10 weeks of deployment, with Purrble being delivered in time for week 4 (T1).

## Intervention

The intervention takes the form of an interactive plush toy (figure 1), which was co-designed with children to support in-the-moment soothing [48-49]. The device is framed as an anxious creature, in need of care and attention when it feels distressed. This distress is indicated by a simulated heartbeat using embedded electronics to produce vibration patterns of i) frantic and anxious, to ii) slow, steady and relaxed. When held, the device emits a frantic heartbeat which can be slowed by stroking movements registered by embedded sensors. Once the device has been “soothed” for long enough, the heartbeat transitions into a purring vibration, indicating a relaxed state. This transition can be achieved in less than 60 seconds but is



1  
2  
3 dependent on the device-human interaction. Further details on the logic model underlying  
4 Purrble can be found in **supplementary materials 1**, or see previous research [49].  
5  
6  
7  
8  
9

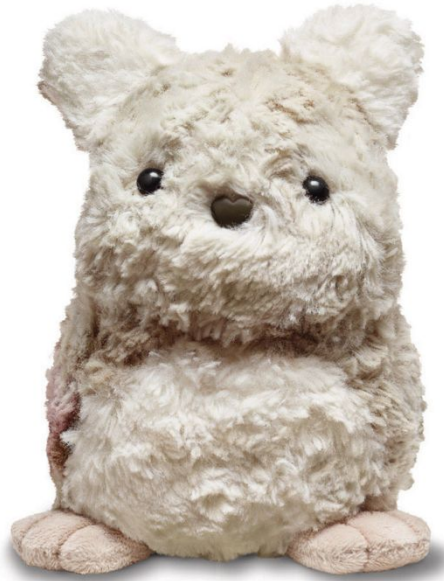

29 *Figure 1: Purrble companion device*  
30

### 31 32 33 **Waitlist - Control**

34 The participants in the control group will be on a waitlist throughout the 13-week trial period.  
35  
36 Once data have been collected at the final timepoint (week 13, T10), waitlist participants will  
37 receive a Purrble to keep. Waitlist control group was selected following discussions with  
38 Sprouting Minds members (see Patient and Public Involvement).  
39  
40  
41  
42  
43

### 44 **Participants**

#### 45 **Eligibility Criteria**

46  
47 When potential participants register their interest for the study, they will be asked  
48 demographic questions relating to the eligibility criteria, providing our information for our  
49 inclusion criteria. These are: i) being between the ages of 16-25 years (inclusive); ii)  
50 identifying as any part of the LGBTQ+ umbrella, iii) having current experiences of self-  
51 harmful thoughts (e.g. in the last month), iv) being able to read, write, and speak English,  
52  
53  
54  
55  
56  
57  
58  
59  
60 and v) living in the UK for the duration of the study. Exclusion criteria are being outside of the

1  
2  
3 age range, identifying as heterosexual cisgender, not experiencing current self-harmful  
4 thoughts, being unable to understand English and living outside the UK.  
5  
6  
7  
8  
9

### ***Recruitment, Randomisation, and Blinding***

10  
11 LGBTQ+ youth will be recruited to the trial by several strategies. These include: i)  
12 approaching secondary schools and colleges, ii) social media adverts, iii) advertising through  
13 stakeholder charities and organisations (e.g., Bounce Black, Harmless, King's College  
14 London newsletter), and iv) online platforms (e.g., MQ Participate). Those organisations  
15 which involve gatekeepers (e.g., schools, colleges, charities, organisations) will be emailed  
16 by one of the leading researchers offering an introductory meeting to discuss the outline of  
17 study, explaining safeguarding protocols, and how to share this information with young  
18 people. Young LGBTQ+ people will then be able to register their interest in the study,  
19 anonymously from gatekeepers. At recruitment, participants will not be blinded to the fact  
20 that Purrble was designed to support ER. The information sheet specifies that participants  
21 will be asked about mood, self-harm, and ER over the course of the study.  
22  
23  
24  
25  
26  
27  
28  
29  
30  
31  
32  
33

34 Once eligibility is confirmed and young LGBTQ+ people have provided written informed  
35 consent, they will be 1:1 randomly assigned to either intervention or waitlist control group,  
36 using a computerised algorithm. A stratification procedure will be applied to balance gender  
37 identity (transgender and gender diverse youth vs. cisgender) across the two arms. The  
38 researcher conducting randomisation will be blind to treatment group allocation. However,  
39 the leading researcher and other team members who will be conducting safeguarding will be  
40 aware of group allocation. Researchers collecting outcome measures will be blinded to  
41 group allocation. Participants will be informed about their assigned condition. The  
42 intervention group will receive Purrble devices before T1 data are collected, with waitlist  
43 participants receiving their Purrble devices after the 3-month follow-up data collection.  
44  
45  
46  
47  
48  
49  
50  
51  
52  
53

54 In the event of change of circumstance, such as a serious adverse event, participants are  
55 asked to inform the research team. Specifically, for follow-up engagements a standard  
56 operation protocol which asks that if a situation changes for a young person (e.g., they are  
57 hospitalised) that the young person informs the research team. This will be directly asked  
58 ("Has your situation changed at all which might impact how you'd like to engage with the  
59  
60

1  
2  
3 study?" via email, with the understanding that the research team will have time to arrange  
4 reasonable adjustments (e.g., if a young person still wants to take part but is within an in-  
5 patient service).  
6

## 8 Power Analysis 9

10 Sample size was determined based on an a-priori power analysis to detect a difference  
11 between the two arms when considering the primary outcome measure, the Difficulties with  
12 Emotion Regulation Scale-8 (DERS8). On the basis of a pilot with LGBTQ+ youth [47] and  
13 other Purrble studies [50, 53], we expect to see a medium effect size for this measure  
14 (d=0.4). This would indicate fewer difficulties with ER among young people who had access  
15 to Purrble.  
16  
17  
18  
19  
20  
21  
22

23 With the anticipated medium effect size, simulations were performed involving a range of  
24 fixed and random effects. Simulations involved linearly increasing effect over the study  
25 period, and sensitivity analysis was performed over a range of scenarios considering the  
26 slope of effect change over time was either fixed or random. The simulation used a one  
27 sided t-test ( $\alpha=0.05$ ), and targeted a sample size giving at least 80% power. The statistic to  
28 be compared between groups is the change in mean DERS8 score in the 2 weeks preceding  
29 intervention (3 assessments in total), to the mean DERS8 assessed at weeks 8, 9, and 10.  
30 The averaging over 3 assessments is intended to reduce the known variance in DERS8  
31 when repeatedly assessed [54]. Other simulations considered only comparing the change in  
32 DERS8 from baseline (week 0) to week 10, comparing the slope of the effect, assessed  
33 using simple linear regression. All simulations suggested better than 60% power with 70  
34 subjects per arm, with the mean change in DERS8 averaged over 3 assessments, and the  
35 comparison of slopes, suggesting >80% power. The sample size of 140 is inflated by 20% to  
36 account for dropout rate [55], rounding up the total sample to 168.  
37  
38  
39  
40  
41  
42  
43  
44  
45  
46  
47  
48  
49  
50

## 51 Outcome Measures 52

53 An overview of all measures can be found in Table 2, and full details can be found in  
54 **supplementary material 2**. Primary and mental health measures will be asked at all  
55 timepoints, with the Purrble intervention group also receiving two additional engagement  
56  
57  
58  
59  
60

measures throughout deployment. An extended survey will replace the weekly survey at three time points, this will include three additional measures to be asked to all participants.

These additional measures were selected to explore the association between self-harm and emotion regulation (Process Model Emotion Regulation Questionnaire - PMERQ) [38-41], perceptions of hope (State Hope Scale - SHS) [13], and loneliness (3-item UCLA loneliness scale) [56], to further explore the qualitative findings represented in our pilot study (Williams et al., in prep). Our findings have previously indicated that Purrble was used to i) refocus or distract attention during moments of distress by addressing the physical manifestation of their discomfort (PMERQ), and ii) comfort in moments of loneliness and provide self-soothing mechanisms (UCLA, SHS) [47].

Considering participant burden, young people will be informed of the time to complete each weekly survey (15 minutes), the extended survey (22 minutes) and will be compensated for their time.

**Table 2: Summary of the outcome measures**

| Outcome Measure                                        | Questions (n) | Type of outcome | Frequency      | Scoring                           | Details of assessment                                                            |
|--------------------------------------------------------|---------------|-----------------|----------------|-----------------------------------|----------------------------------------------------------------------------------|
| <i>Primary measure</i>                                 |               |                 |                |                                   |                                                                                  |
| Difficulties in emotion regulation scale-8 DERS8; [54] | 8             | Primary outcome | All timepoints | 8-40 (higher = more difficulties) | Difficulties associated with response to situations eliciting negative emotions. |

1  
2  
3  
4  
5  
6  
7  
8  
9  
10  
11  
12  
13  
14  
15  
16  
17  
18  
19  
20  
21  
22  
23  
24  
25  
26  
27  
28  
29  
30  
31  
32  
33  
34  
35  
36  
37  
38  
39  
40  
41  
42  
43  
44  
45  
46  
47  
48  
49  
50  
51  
52  
53  
54  
55  
56  
57  
58  
59  
60

| <b><i>Mental health measures</i></b>                              |    |               |                    |                                     |                                                                                                    |
|-------------------------------------------------------------------|----|---------------|--------------------|-------------------------------------|----------------------------------------------------------------------------------------------------|
| Self-Harm<br>Questionnaire<br>screening<br>questions<br>SHQ; [57] | 3  | Mental health | All<br>timepoints  | Analysed<br>separately              | Frequency and risk<br>of self-harm<br>thoughts, suicidal<br>ideation, and<br>behaviour.            |
| Self-Harm<br>Questionnaire<br>additional items<br>SHQ; [57]       | 22 | Covariate     | Once<br>(baseline) | Analysed<br>separately              | 4 dimensions of<br>self-harm (NSSI,<br>suicide attempts,<br>suicide threats,<br>suicide ideation). |
| Generalised<br>Anxiety Disorder<br>questionnaire<br>GAD-7; [58]   | 7  | Mental health | All<br>timepoints  | 0-21 (higher =<br>greater severity) | Presence and<br>severity of<br>generalized<br>anxiety disorder                                     |
| Patient Health<br>Questionnaire<br>PHQ-9; [59]                    | 9  | Mental health | All<br>timepoints  | 0-27 (higher =<br>greater severity) | Severity of<br>depressive<br>symptoms                                                              |
| <b><i>Proximal &amp; mechanistic measures</i></b>                 |    |               |                    |                                     |                                                                                                    |

|                                                                                                                   |                                                                      |   |             |              |                                                                                                     |                                                                                    |
|-------------------------------------------------------------------------------------------------------------------|----------------------------------------------------------------------|---|-------------|--------------|-----------------------------------------------------------------------------------------------------|------------------------------------------------------------------------------------|
| 1<br>2<br>3<br>4<br>5<br>6<br>7<br>8<br>9<br>10<br>11<br>12<br>13<br>14<br>15<br>16<br>17<br>18<br>19<br>20<br>21 | Process Model of Emotion Regulation Questionnaire<br><br>PMERQ; [60] | 9 | Mechanistic | 3 timepoints | 2 subscales<br><br>Average across each subscale, with higher scores indicating greater endorsement. | Attentional deployment subscales are selected; engagement and disengagement focus. |
| 22<br>23<br>24<br>25<br>26<br>27<br>28<br>29<br>30                                                                | State Hope Scale<br><br>SHS; [61]                                    | 6 | Proximal    | 3 timepoints | 6-48 (higher = greater state hopefulness)                                                           | Ongoing goal-directed thinking; agency and pathways.                               |
| 31<br>32<br>33<br>34<br>35<br>36<br>37<br>38<br>39<br>40<br>41<br>42                                              | The 3-item UCLA Loneliness scale for children<br><br>[62]            | 3 | Proximal    | 3 timepoints | 3-12 (higher = more loneliness)                                                                     | Subjective feelings of loneliness.                                                 |
| 43<br>44<br>45<br>46                                                                                              | <i>Engagement measures</i>                                           |   |             |              |                                                                                                     |                                                                                    |
| 47<br>48<br>49<br>50<br>51<br>52<br>53<br>54<br>55<br>56<br>57<br>58<br>59<br>60                                  | Bespoke Purrble questions<br><br>[53]                                | 7 | Engagement  | Deployment   | Analysed separately                                                                                 | Purrble use and perceived usefulness.                                              |

|                                                                                   |   |            |            |                                                                           |                                                                                                                     |
|-----------------------------------------------------------------------------------|---|------------|------------|---------------------------------------------------------------------------|---------------------------------------------------------------------------------------------------------------------|
| Twente<br>Engagement With<br>eHealth<br>Technologies<br>Scale<br><br>TWEETS; [63] | 9 | Engagement | Deployment | 3 subscales<br><br>Total score per<br>subscale =<br>greater<br>engagement | Engagement with<br>intervention<br>device, considering<br>behaviour,<br>cognitive, and<br>affective<br>engagements. |
|-----------------------------------------------------------------------------------|---|------------|------------|---------------------------------------------------------------------------|---------------------------------------------------------------------------------------------------------------------|

## Post deployment Interviews

We will collect semi-structured interview data from LGBTQ+ young people from up to 40% of the intervention group (n=37), and approximately 20% of the control group (n=17). The interviews will be conducted following the deployment period. We will specifically aim to recruit young people who demonstrated the highest and lowest changes in the outcome data over the trial to explore and understand the potential moderators relating to the intervention and mental health across the trial period.

The semi-structured interview will explore the engagement and appropriation of the Purrble device, whether LGBTQ+ young people had felt that this had helped them with their ER, mental health more broadly, or self-harmful thoughts, and how Purrble may (or may not) be suitable for other audiences. We will compare these experiences between intervention and control participants, exploring other mechanisms used by LGBTQ+ youth who experience self-harm.

## Hypotheses

### **Primary hypothesis**

Across the trial, we hypothesise that access to the Purrble intervention (compared to the waitlist control) will lead to a direct decrease in self-reported difficulties with emotion

1  
2  
3 regulation as measured by the primary outcome (DERS8), averaged between three pre-  
4 deployment (weeks 1-3) and our final three deployment assessments (weeks 11-13).  
5  
6  
7  
8  
9

### 10 **Secondary hypothesis**

11 Intervention effects will be moderated by engagement with the device, measured by bespoke  
12 questions and the TWEETS questionnaire. Secondary outcomes in the Purrble effectiveness  
13 trial are: self-harmful thoughts, symptoms of anxiety, and symptoms of depression. These  
14 three constructs were selected as secondary outcomes based on the high prevalence of  
15 these experiences among LGBTQ+ youth [3-8] and their association with poor ER [38-41].  
16  
17  
18  
19  
20

21 The three secondary hypotheses are as listed when compared to waitlist controls:  
22

- 23 1. Engagement with the Purrble intervention will reduce the frequency of self-reported  
24 self-harmful thoughts (SHQ).
- 25 2. Engagement with the Purrble intervention will reduce the severity of self-reported  
26 anxiety symptoms (GAD-7).
- 27 3. Engagement with the Purrble intervention will reduce the severity of self-reported  
28 depression symptoms (PHQ-9).
- 29  
30  
31  
32  
33

### 34 **Additional analyses**

35 Additional hypotheses aim to understand the impact of Purrble on relevant proximal and  
36 mechanistic outcomes. The following hypotheses will be investigated across the trial:  
37  
38  
39

- 40 1. Greater within-group changes will be seen among intervention group participants, with  
41 increasing levels of endorsement for attentional deployment (PMERQ), than among  
42 those participants of the control group.
- 43 2. There will be a greater increase in state hopefulness (SHS) in the Purrble intervention  
44 group than the waitlist control.
- 45 3. Participants in the Purrble intervention group will report lower loneliness (UCLA) than  
46 those in the waitlist control group.
- 47  
48  
49  
50  
51  
52  
53  
54  
55  
56  
57  
58  
59  
60



## Statistical analyses

Testing the hypothesis that access to the Purrble intervention will lead to a reduction in emotion dysregulation, as measured by the composite primary outcome, will be done using a one-sided t-test.

As exploratory analyses linear mixed models will be fitted to gain insight into how emotion dysregulation is altered with access to the intervention. In particular, we will regress the weekly outcome score on an indicator for the Purrble condition, a linear time trend, and an interaction between the treatment indicator and time to examine differential trends in the two groups. We will adjust for baseline covariates and include participant-level random intercepts and slopes to account for persistent baseline differences between young people as well as person-specific time trends in the outcome. While the outcome is limited to DERS8 scores ranging from 8-40, we will model it as continuous data.

For secondary aims, we will use analogous linear mixed models to assess the impact of Purrble on relevant outcomes (cf., hypotheses above), adding baseline DERS8 as another covariate. We will not adjust for multiple comparisons, as these are exploratory aims meant to be hypothesis-generating. Similarly, we will also assess the impact of access to Purrble on changes in proximal outcomes, as well as explore whether these appear to moderate changes on primary and secondary outcomes.

## Patient and Public Involvement

The study design was discussed with, and approved by, Sprouting Minds members (MRC Digital Youth Young Person Advisory group), with specific input considering the intervention arms and safeguarding procedures. These young people highlighted that “waitlist control” conditions mimic clinical experiences of waiting for services, therefore this was considered an acceptable and realistic control. Whereas safeguarding procedures needed to balance participant autonomy and ensuring safe research.

## Ethics and dissemination

The study will be conducted according to local regulations and the Declaration of Helsinki of 1975, revised in 2008. The Ethical Committee at King's College London, UK approved the study (RESCM-22/23-34570). Written consent will be obtained from all participants prior to commencing their involvement in the study, with explicit understanding of the study and safeguarding procedures (see supplementary materials 3) being obtained during study briefing sessions. The trial is registered with ClinicalTrials.gov (NCT06025942).

We aim for our findings to be disseminated across academic fields (human-computer interactions, psychology, implementation sciences), alongside showcasing the findings to LGBTQ+ youth, community groups, and wider stakeholders. This will be achieved through presentations at national and international conferences, peer-reviewed journal publications, community outreach and PPI events. During dissemination, we will be liaising with youth populations to establish next steps for this research, considering additional co-design of materials to sit around/alongside Purrrble.

## Discussion

Despite the high prevalence of self-harm among LGBTQ+ young people [10, 37], there is little/no evidence for interventions which support the reduction of self-harm through situated skill application of ER. This low-cost intervention has the potential to reduce difficulties associated with emotion regulation, and therefore offer an opportunity to improve youth's self-harm, as well as other associated mental health difficulties. If successful, the study will provide a proof-of-concept example of a bottom-up emotion regulation intervention, enabling young people to access ongoing support for their distress through an engaging digital resource.

Previous research with severely anxious students has indicated that Purrrble was associated with reductions of anxious symptoms, qualitatively explained by the adoption of ER strategies [50]. These findings were translated in our pilot study of Purrrble within the LGBTQ+ population [47]. Therefore, it is hypothesised that in this study, engagement with Purrrble will be associated with reduced anxiety and increased ER across the trial.

1  
2  
3 Effective ER, such as utilising adaptive strategies (e.g., cognitive appraisal), can be seen as  
4 a protective factor in self-harm and suicide research [64]. If Purrble can support reduction of  
5 self-harmful thoughts in young LGBTQ+ people through enhanced ER, then this is  
6  
7 potentially a tangible, highly modular and scalable device which can be used to prevent the  
8  
9 transition between motivational and volitional experiences [65].  
10  
11  
12  
13  
14

## 15 Acknowledgements

16  
17 The authors (AJW, ET, NN, ACN, CH, PS) acknowledge the support of the UK Research  
18 and Innovation (UKRI) Digital Youth Programme award [MRC project reference  
19 MR/W002450/1] which is part of the AHRC/ESRC/MRC Adolescence, Mental Health and the  
20 Developing Mind programme. The authors would like to thank our PPI group Sprouting  
21 Minds, including the two co-chairs, Sarah Doherty and Lucy-Paige Willingham, for their  
22 ongoing support and contributions to the project. RB receives salary and research support  
23 from an Australian National Health and Medical Research Council (NHMRC) Emerging  
24 Leadership Investigator Grant (EL2; GNT2008073).  
25  
26  
27  
28  
29  
30  
31  
32  
33

34  
35 AJW, ET, PS conceived the study. AJW and PS designed the study, with statistical expertise  
36 from CT and patient and public input from NN and ACN. AJW designed the study materials,  
37 which were reviewed with feedback between NN, ACN, and SC. AJW obtained ethical  
38 approval. JJG, ET, PS and AJW contributed to measure selection. AJW drafted the first  
39 version of the protocol manuscript for publication, with input from all authors. RB and AJW  
40 revised the submitted protocol manuscript together.  
41  
42  
43  
44  
45  
46  
47

48 We would also like to thank Mathijs Lucassen for his input while developing this trial.  
49

## 50 Funding

51  
52 This study is funded by the UKRI MRC Digital Youth (MR/W002450/1) and the UKRI Future  
53 Leaders Fellowship (MR/T041897/1).  
54  
55  
56  
57  
58  
59  
60

## Competing interests statement

PS has been involved in the development of what is now Purrble as part of his postdoctoral fellowship; and serves as a paid research adviser to the Committee for Children but has no financial stake in either CfC (Purrble brand owners) or Sproutel (company manufacturing Purrbles). Neither Committee for Children nor Sproutel had access to the data or had been part of the data collection in any way, nor did they approve or see the publication before it was submitted. There were no conflicting interests among the remaining research team.

## References:

1. Kendall T, Taylor C, Bhatti H, Chan M, Kapur N. Longer term management of self harm: summary of NICE guidance. *Bmj*. 2011 Nov 23;343. doi.org/10.1136/bmj.d7073
2. World Health Organisation. Suicide [fact sheet] [Internet]. World Health Organization; 2021 [cited 2023 Mar 24]. Available from: <https://www.who.int/news-room/fact-sheets/detail/suicide>
3. Coker TR, Austin SB, Schuster MA. The health and health care of lesbian, gay, and bisexual adolescents. *Annual review of public health*. 2010 Apr 21;31:457-77. doi.org/10.1146/annurev.publhealth.012809.103636
4. Haas AP, Eliason M, Mays VM, Mathy RM, Cochran SD, D'Augelli AR, Silverman MM, Fisher PW, Hughes T, Rosario M, Russell ST. Suicide and suicide risk in lesbian, gay, bisexual, and transgender populations: Review and recommendations. *Journal of homosexuality*. 2010 Dec 30;58(1):10-51. DOI: 10.1080/00918369.2011.534038
5. Marshal MP, Dietz LJ, Friedman MS, Stall R, Smith HA, McGinley J, Thoma BC, Murray PJ, D'Augelli AR, Brent DA. Suicidality and depression disparities between sexual minority and heterosexual youth: A meta-analytic review. *Journal of adolescent health*. 2011 Aug 1;49(2):115-23. doi.org/10.1016/j.jadohealth.2011.02.005
6. Saewyc EM. Research on adolescent sexual orientation: Development, health disparities, stigma, and resilience. *Journal of research on adolescence*. 2011 Mar;21(1):256-72. doi.org/10.1111/j.1532-7795.2010.00727.x
7. McDermott E, Hughes E, Rawlings V. Norms and normalisation: understanding lesbian, gay, bisexual, transgender and queer youth, suicidality and help-seeking.

- Culture, Health & Sexuality. 2017 Feb 1;20(2):156-72.  
doi.org/10.1080/13691058.2017.1335435
8. Irish M, Solmi F, Mars B, King M, Lewis G, Pearson RM, Pitman A, Rowe S, Srinivasan R, Lewis G. Depression and self-harm from adolescence to young adulthood in sexual minorities compared with heterosexuals in the UK: a population-based cohort study. *The Lancet Child & Adolescent Health*. 2019 Feb 1;3(2):91-8. doi.org/10.1016/S2352-4642(18)30343-2
9. Chan MK, Bhatti H, Meader N, Stockton S, Evans J, O'Connor RC, Kapur N, Kendall T. Predicting suicide following self-harm: systematic review of risk factors and risk scales. *The British Journal of Psychiatry*. 2016 Oct;209(4):277-83. doi: 10.1192/bjp.bp.115.170050
10. Di Giacomo E, Krausz M, Colmegna F, Aspesi F, Clerici M. Estimating the risk of attempted suicide among sexual minority youths: a systematic review and meta-analysis. *JAMA pediatrics*. 2018 Dec 1;172(12):1145-52. doi:10.1001/jamapediatrics.2018.2731
11. Marchi M, Arcolin E, Fiore G, Travascio A, Uberti D, Amaddeo F, Converti M, Fiorillo A, Mirandola M, Pinna F, Ventriglio A. Self-harm and suicidality among LGBTIQ people: a systematic review and meta-analysis. *International review of psychiatry*. 2022 May 19;34(3-4):240-56. doi.org/10.1080/09540261.2022.2053070
12. Warne N, Heron J, Mars B, Solmi F, Biddle L, Gunnell D, Hammerton G, Moran P, Munafò M, Penton-Voak I, Skinner A. Emotional dysregulation in childhood and disordered eating and self-harm in adolescence: prospective associations and mediating pathways. *Journal of child psychology and psychiatry*. 2023 May;64(5):797-806. doi.org/10.1111/jcpp.13738
13. Mars B, Heron J, Klonsky ED, Moran P, O'Connor RC, Tilling K, Wilkinson P, Gunnell D. Predictors of future suicide attempt among adolescents with suicidal thoughts or non-suicidal self-harm: a population-based birth cohort study. *The Lancet Psychiatry*. 2019 Apr 1;6(4):327-37. doi.org/10.1016/S2215-0366(19)30030-6
14. Geulayov G, Casey D, McDonald KC, Foster P, Pritchard K, Wells C, Clements C, Kapur N, Ness J, Waters K, Hawton K. Incidence of suicide, hospital-presenting non-fatal self-harm, and community-occurring non-fatal self-harm in adolescents in England (the iceberg model of self-harm): a retrospective study. *The Lancet Psychiatry*. 2018 Feb 1;5(2):167-74. doi.org/10.1016/S2215-0366(17)30478-9

- 1  
2  
3  
4  
5  
6  
7  
8  
9  
10  
11  
12  
13  
14  
15  
16  
17  
18  
19  
20  
21  
22  
23  
24  
25  
26  
27  
28  
29  
30  
31  
32  
33  
34  
35  
36  
37  
38  
39  
40  
41  
42  
43  
44  
45  
46  
47  
48  
49  
50  
51  
52  
53  
54  
55  
56  
57  
58  
59  
60
15. Geulayov G, Borschmann R, Mansfield KL, Hawton K, Moran P, Fazel M. Utilization and acceptability of formal and informal support for adolescents following self-harm before and during the first COVID-19 lockdown: results from a large-scale English schools survey. *Frontiers in psychiatry*. 2022 Jun 24;13:881248.  
doi.org/10.3389/fpsyt.2022.881248
  16. Holland J, Sayal K, Berry A, Sawyer C, Majumder P, Vostanis P, Armstrong M, Harroe C, Clarke D, Townsend E. What do young people who self-harm find helpful? A comparative study of young people with and without experience of being looked after in care. *Child and adolescent mental health*. 2020 Sep;25(3):157-64.  
Doi.org/10.1111/camh.12384
  17. Michelmore L, Hindley P. Help-seeking for suicidal thoughts and self-harm in young people: A systematic review. *Suicide and Life-Threatening Behavior*. 2012 Oct;42(5):507-24. doi.org/10.1111/j.1943-278X.2012.00108.x
  18. Owens C, Hansford L, Sharkey S, Ford T. Needs and fears of young people presenting at accident and emergency department following an act of self-harm: secondary analysis of qualitative data. *The British Journal of Psychiatry*. 2016 Mar;208(3):286-91. doi.org/10.1192/bjp.bp.113.141242
  19. Williams AJ, Nielsen E, Coulson NS. "They aren't all like that": Perceptions of clinical services, as told by self-harm online communities. *Journal of health psychology*. 2020 Nov;25(13-14):2164-77. doi.org/10.1177/13591053187884
  20. Long M, Manktelow R, Tracey A. We are all in this together: working towards a holistic understanding of self-harm. *Journal of Psychiatric and Mental Health Nursing*. 2013 Mar;20(2):105-13. doi.org/10.1111/j.1365-2850.2012.01893.x
  21. Bathje G, Pryor J. The relationships of public and self-stigma to seeking mental health services. *Journal of Mental Health Counseling*. 2011 Apr 1;33(2):161-76.  
doi.org/10.17744/mehc.33.2.g632039274160411
  22. Stonewall. LGBT in Britain Health Report [Internet]. Stonewall; 2018 [cited 2023 Mar 24]. Available from:  
[https://www.stonewall.org.uk/system/files/lgbt\\_in\\_britain\\_health.pdf](https://www.stonewall.org.uk/system/files/lgbt_in_britain_health.pdf)
  23. Steinke J, Root-Bowman M, Estabrook S, Levine DS, Kantor LM. Meeting the needs of sexual and gender minority youth: formative research on potential digital health interventions. *Journal of Adolescent Health*. 2017 May 1;60(5):541-8.  
doi.org/10.1016/j.jadohealth.2016.11.023

- 1  
2  
3  
4 24. Bowen D, Jabson J, Kamen C. mHealth: an avenue for promoting health among  
5 sexual and gender minority populations?. *Mhealth*. 2016;2. doi:  
6 10.21037/mhealth.2016.09.01  
7  
8  
9 25. Strauss P, Morgan H, Toussaint DW, Lin A, Winter S, Perry Y. Trans and gender  
10 diverse young people's attitudes towards game-based digital mental health  
11 interventions: A qualitative investigation. *Internet Interventions*. 2019 Dec  
12 1;18:100280. Doi.org/10.1016/j.invent.2019.100280  
13  
14 26. Craig SL, McInroy L. You can form a part of yourself online: The influence of new  
15 media on identity development and coming out for LGBTQ youth. *Journal of Gay &*  
16 *Lesbian Mental Health*. 2014 Jan 1;18(1):95-109.  
17 doi.org/10.1080/19359705.2013.777007  
18  
19 27. Gulliver A, Griffiths KM, Christensen H. Perceived barriers and facilitators to mental  
20 health help-seeking in young people: a systematic review. *BMC psychiatry*. 2010  
21 Dec;10(1):1-9. doi.org/10.1186/1471-244X-10-113  
22  
23 28. McIntyre J, Daley A, Rutherford K, Ross LE. Systems-level barriers in accessing  
24 supportive mental health services for sexual and gender minorities: Insights from the  
25 provider's perspective. *Canadian Journal of Community Mental Health*. 2012 Mar  
26 22;30(2):173-86. doi.org/10.7870/cjcmh-2011-0023  
27  
28 29. Gilbey D, Morgan H, Lin A, Perry Y. Effectiveness, acceptability, and feasibility of  
29 digital health interventions for LGBTIQ+ young people: systematic review. *Journal of*  
30 *medical Internet research*. 2020 Dec 3;22(12):e20158. doi:10.2196/20158  
31  
32 30. Martin S. *Developing and evaluating QueerViBE: an online intervention to empower*  
33 *trans and non-binary youth* (Doctoral dissertation, Anglia Ruskin University). [cited  
34 2023 Mar 24].  
35  
36 31. Pachankis JE, Goldfried MR. Expressive writing for gay-related stress: psychosocial  
37 benefits and mechanisms underlying improvement. *Journal of consulting and clinical*  
38 *psychology*. 2010 Feb;78(1):98. Doi.org/10.1037/a0017580  
39  
40 32. Lucassen MF, Merry SN, Hatcher S, Frampton CM. Rainbow SPARX: A novel  
41 approach to addressing depression in sexual minority youth. *Cognitive and*  
42 *Behavioral Practice*. 2015 May 1;22(2):203-16. Oi.org/10.1016/j.cbpra.2013.12.008  
43  
44 33. Fleming JB, Hill YN, Burns MN. Usability of a culturally informed mHealth intervention  
45 for symptoms of anxiety and depression: feedback from young sexual minority men.  
46 *JMIR human factors*. 2017 Aug 25;4(3):e7392. doi: 10.2196/humanfactors.7392  
47  
48  
49  
50  
51  
52  
53  
54  
55  
56  
57  
58  
59  
60

- 1  
2  
3  
4 34. Fish JN, Williams ND, McInroy LB, Pacey MS, Edsall RN, Devadas J, Henderson  
5 SB, Levine DS. Q Chat Space: assessing the feasibility and acceptability of an  
6 internet-based support program for LGBTQ youth. *Prevention science*. 2021 Sep 6:1-  
7 2. doi.org/10.1007/s11121-021-01291-y  
8  
9  
10 35. Williams AJ, Arcelus J, Townsend E, Michail M. Feasibility and acceptability of  
11 experience sampling among LGBTQ+ young people with self-harmful thoughts and  
12 behaviours. *Frontiers in psychiatry*. 2022 Aug 17;13:916164.  
13 Doi.org/10.3389/fpsy.2022.916164  
14  
15 36. Williams AJ, Arcelus J, Townsend E, Michail M. Understanding the processes  
16 underlying self-harm ideation and behaviors within LGBTQ+ young people: A  
17 qualitative study. *Archives of suicide research*. 2021 Apr 3;27(2):380-96.  
18 doi.org/10.1080/13811118.2021.2003273  
19  
20 37. Hatchel T, Polanin JR, Espelage DL. Suicidal thoughts and behaviors among LGBTQ  
21 youth: Meta-analyses and a systematic review. *Archives of suicide research*. 2019  
22 Jan 2;25(1):1-37. doi.org/10.1080/13811118.2019.1663329  
23  
24 38. Chen WL, Chun CC. Association between emotion dysregulation and distinct groups  
25 of non-suicidal self-injury in Taiwanese female adolescents. *International journal of  
26 environmental research and public health*. 2019 Sep;16(18):3361.  
27 Doi.org/10.3390/ijerph16183361  
28  
29 39. Clapham R, Brausch A. Internalizing and externalizing symptoms moderate the  
30 relationship between emotion dysregulation and suicide ideation in adolescents.  
31 *Child Psychiatry & Human Development*. 2022 Sep 6:1-2. doi.org/10.1007/s10578-  
32 022-01413-9  
33  
34 40. Kapatais A, Williams AJ, Townsend E. The mediating role of emotion regulation on  
35 self-harm among gender identity and sexual orientation minority (LGBTQ+)  
36 individuals. *Archives of suicide research*. 2023 Apr 3;27(2):165-78.  
37 doi.org/10.1080/13811118.2022.2064254  
38  
39 41. Fraser G, Wilson MS, Garisch JA, Robinson K, Brocklesby M, Kingi T, O'Connell A,  
40 Russell L. Non-suicidal self-injury, sexuality concerns, and emotion regulation among  
41 sexually diverse adolescents: A multiple mediation analysis. *Archives of suicide  
42 research*. 2018 Jul 3;22(3):432-52. doi.org/10.1080/13811118.2017.1358224  
43  
44 42. Sloan E, Hall K, Moulding R, Bryce S, Mildred H, Staiger PK. Emotion regulation as a  
45 transdiagnostic treatment construct across anxiety, depression, substance, eating  
46  
47  
48  
49  
50  
51  
52  
53  
54  
55  
56  
57  
58  
59  
60



- 1  
2  
3 and borderline personality disorders: A systematic review. *Clinical psychology*  
4 review. 2017 Nov 1;57:141-63. [Doi.org/10.1016/j.cpr.2017.09.002](https://doi.org/10.1016/j.cpr.2017.09.002)  
5  
6  
7 43. Gross JJ. Emotion regulation: Current status and future prospects. *Psychological*  
8 inquiry. 2015 Jan 2;26(1):1-26. [doi.org/10.1080/1047840X.2014.940781](https://doi.org/10.1080/1047840X.2014.940781)  
9  
10 44. Fernandez KC, Jazaieri H, Gross JJ. Emotion regulation: A transdiagnostic  
11 perspective on a new RDoC domain. *Cognitive therapy and research*. 2016  
12 Jun;40:426-40. [doi.org/10.1007/s10608-016-9772-2](https://doi.org/10.1007/s10608-016-9772-2)  
13  
14 45. Wolff JC, Thompson E, Thomas SA, Nesi J, Bettis AH, Ransford B, Scopelliti K,  
15 Frazier EA, Liu RT. Emotion dysregulation and non-suicidal self-injury: A systematic  
16 review and meta-analysis. *European Psychiatry*. 2019 Jun;59:25-36.  
17 [Doi.org/10.1016/j.eurpsy.2019.03.004](https://doi.org/10.1016/j.eurpsy.2019.03.004)  
18  
19 46. Fox KR, Franklin JC, Ribeiro JD, Kleiman EM, Bentley KH, Nock MK. Meta-analysis  
20 of risk factors for nonsuicidal self-injury. *Clinical psychology review*. 2015 Dec  
21 1;42:156-67. [Doi.org/10.1016/j.cpr.2015.09.002](https://doi.org/10.1016/j.cpr.2015.09.002)  
22  
23 47. Williams, AJ, Townsend, T, Naeche, N, Chapman-Nisar, A, Hollis, C, Slovak, P.  
24 Investigating the feasibility, acceptability and appropriation of a socially assistive  
25 robot among minority youth at-risk of self-harm. [in submission]  
26  
27 48. Slovák P, Theofanopoulou N, Cecchet A, Cottrell P, Altarriba Bertran F, Dagan E,  
28 Childs J, Isbister K. " I just let him cry... Designing Socio-Technical Interventions in  
29 Families to Prevent Mental Health Disorders. *Proceedings of the ACM on Human-*  
30 *Computer Interaction*. 2018 Nov 1;2(CSCW):1-34. [Doi.org/10.1145/3274429](https://doi.org/10.1145/3274429)  
31  
32 49. Theofanopoulou N, Isbister K, Edbrooke-Childs J, Slovák P. A smart toy intervention  
33 to promote emotion regulation in middle childhood: Feasibility study. *JMIR mental*  
34 *health*. 2019 Aug 5;6(8):e14029. doi: 10.2196/14029  
35  
36 50. Williams AJ, Freed M, Theofanopoulou N, Roquet CD, Klasnja P, Gross JJ, Schleider  
37 J, Slovak P. Feasibility, perceived impact, and acceptability of a socially assistive  
38 robot to support emotion regulation with highly anxious university students: an open  
39 trial. *JMIR Mental Health*. 2023. [in prep]  
40  
41 51. Schulz KF, Altman DG, Moher D, CONSORT Group\*. CONSORT 2010 statement:  
42 updated guidelines for reporting parallel group randomized trials. *Annals of internal*  
43 *medicine*. 2010 Jun 1;152(11):726-32. [doi.org/10.7326/0003-4819-152-11-](https://doi.org/10.7326/0003-4819-152-11-201006010-00232)  
44 [201006010-00232](https://doi.org/10.7326/0003-4819-152-11-201006010-00232)  
45  
46  
47  
48  
49  
50  
51  
52  
53  
54  
55  
56  
57  
58  
59  
60

- 1  
2  
3  
4 52. Montgomery P, Grant S, Mayo-Wilson E, Macdonald G, Michie S, Hopewell S, Moher  
5 D. Reporting randomised trials of social and psychological interventions: the  
6 CONSORT-SPI 2018 Extension. *Trials*. 2018 Dec;19(1):1-4. doi.org/10.1186/s13063-  
7 018-2733-1  
8  
9  
10 53. Daudén Roquet C, Theofanopoulou N, Freeman JL, Schleider J, Gross JJ, Davis K,  
11 Townsend E, Slovak P. Exploring Situated & Embodied Support for Youth's Mental  
12 Health: Design Opportunities for Interactive Tangible Device. In *Proceedings of the*  
13 *2022 CHI Conference on Human Factors in Computing Systems* 2022 Apr 29 (pp. 1-  
14 16). [doi.org/10.1145/3491102.3502135](https://doi.org/10.1145/3491102.3502135)  
15  
16  
17  
18 54. Penner F, Steinberg L, Sharp C. The Development and Validation of the Difficulties in  
19 Emotion Regulation Scale-8: Providing Respondents with a Uniform Context That  
20 Elicits Thinking About Situations Requiring Emotion Regulation. *Journal of*  
21 *Personality Assessment*. 2022 Oct 7:1-0. Doi.org/10.1080/00223891.2022.2133722  
22  
23  
24  
25 55. Cohen KA, Schleider JL. Adolescent dropout from brief digital mental health  
26 interventions within and beyond randomized trials. *Internet Interventions*. 2022 Mar  
27 1;27:100496. Doi.org/10.1016/j.invent.2022.100496  
28  
29  
30  
31 56. Shaw RJ, Cullen B, Graham N, Lyall DM, Mackay D, Okolie C, Pearsall R, Ward J,  
32 John A, Smith DJ. Living alone, loneliness and lack of emotional support as  
33 predictors of suicide and self-harm: A nine-year follow up of the UK Biobank cohort.  
34 *Journal of Affective Disorders*. 2021 Jan 15;279:316-23.  
35 Doi.org/10.1016/j.jad.2020.10.026  
36  
37  
38  
39 57. Ougrin D, Boege I. Brief report: the Self Harm Questionnaire: a new tool designed to  
40 improve identification of self harm in adolescents. *Journal of adolescence*. 2013 Feb  
41 1;36(1):221-5. Doi.org/10.1016/j.adolescence.2012.09.006  
42  
43  
44  
45 58. Spitzer RL, Kroenke K, Williams JB, Löwe B. A brief measure for assessing  
46 generalized anxiety disorder: the GAD-7. *Archives of internal medicine*. 2006 May  
47 22;166(10):1092-7. doi:10.1001/archinte.166.10.1092  
48  
49  
50 59. Kroenke K, Spitzer RL, Williams JB. The PHQ-9: validity of a brief depression  
51 severity measure. *Journal of general internal medicine*. 2001 Sep;16(9):606-13.  
52 doi.org/10.1046/j.1525-1497.2001.016009606.x  
53  
54  
55 60. Olderbak S, Uusberg A, MacCann C, Pollak KM, Gross JJ. The Process Model of  
56 Emotion Regulation Questionnaire: assessing individual differences in strategy stage  
57 and orientation. *Assessment*. 2022 Dec 9:10731911221134601.  
58  
59  
60

- 1  
2  
3  
4 61. Snyder CR, Sympson SC, Ybasco FC, Borders TF, Babyak MA, Higgins RL.  
5 Development and validation of the State Hope Scale. *Journal of personality and*  
6 *social psychology*. 1996 Feb;70(2):321. doi.org/10.1037/0022-3514.70.2.321  
7  
8  
9 62. Testing of loneliness questions in surveys - Office for National Statistics [Internet].  
10 Ons.gov.uk. 2018. Available from:  
11 [https://www.ons.gov.uk/peoplepopulationandcommunity/wellbeing/compendium/natio](https://www.ons.gov.uk/peoplepopulationandcommunity/wellbeing/compendium/nationalmeasurementofloneliness/2018/testingoflonelinessquestionsinsurveys)  
12 [nalmeasurementofloneliness/2018/testingoflonelinessquestionsinsurveys](https://www.ons.gov.uk/peoplepopulationandcommunity/wellbeing/compendium/nationalmeasurementofloneliness/2018/testingoflonelinessquestionsinsurveys). [cited 2023  
13 Mar 24].  
14  
15  
16  
17 63. Kelders SM, Kip H, Greeff J. Psychometric evaluation of the TWente Engagement  
18 with Ehealth Technologies Scale (TWEETS): evaluation study. *Journal of medical*  
19 *internet research*. 2020 Oct 9;22(10):e17757. doi: 10.2196/17757  
20  
21  
22 64. Colmenero-Navarrete L, García-Sancho E, Salguero JM. Relationship between  
23 emotion regulation and suicide ideation and attempt in adults and adolescents: a  
24 systematic review. *Archives of suicide research*. 2022 Oct 2;26(4):1702-35.  
25 Doi.org/10.1080/13811118.2021.1999872  
26  
27  
28 65. O'Connor RC, Kirtley OJ. The integrated motivational–volitional model of suicidal  
29 behaviour. *Philosophical Transactions of the Royal Society B: Biological Sciences*.  
30 2018 Sep 5;373(1754):20170268. doi.org/10.1098/rstb.2017.0268  
31  
32  
33  
34  
35  
36  
37  
38  
39  
40  
41  
42  
43  
44  
45  
46  
47  
48  
49  
50  
51  
52  
53  
54  
55  
56  
57  
58  
59  
60

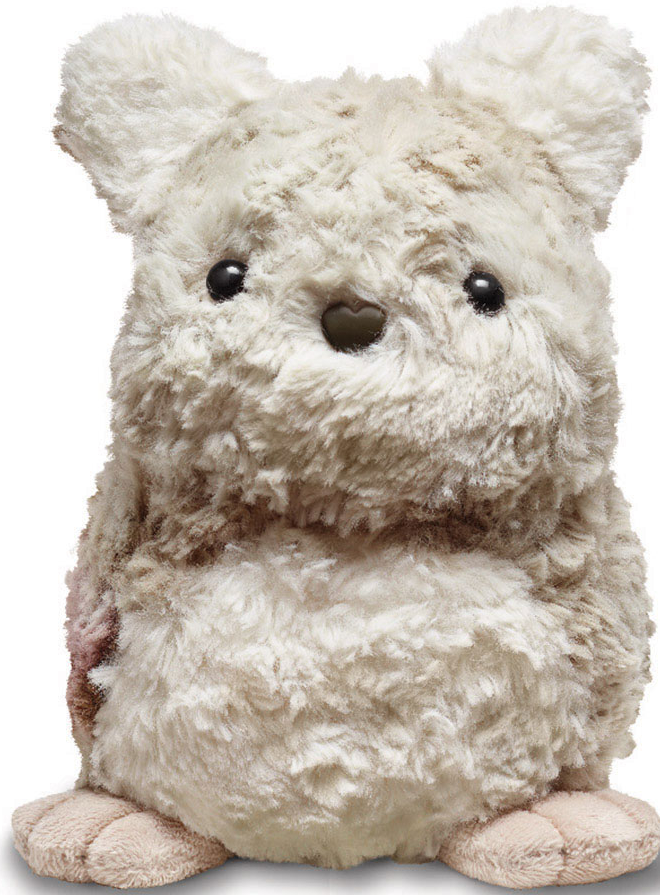

Purble: Intervention device

352x349mm (72 x 72 DPI)

### ***Purrble logic model***

Purrble operates on 3 levels:

1. Purrble directly provides in-the-moment soothing support in naturally occurring emotional moments when one would attempt to calm down. The physical and interactive design aims to tap into known regulatory factors using the extended Process Model of Emotion Regulation (Gross, 2015). This focuses on two separate stages of the ER process; i) the attentional deployment stage (Aldao et al., 2015; Sheppes & Gross, 2012; Sheppes et al., 2014; Farb et al., 2014) by shifting attention from the emotional situation towards interacting with the device, and ii) the response modulation stage (Beetz et al., 2012; Dore et al., 2017; Reeck et al., 2016; Coan et al., 2006; Crossman et al., 2018; Rabbit et al., 2015) by facilitating down-regulation through pleasant tactical interactions simulating the emotion regulatory effect of human-animal interactions.
2. Mechanisms of Purrble are designed to facilitate long-term engagement, by building on positive subjective experiences of in-the-moment soothing. As the device is framed as an anxious creature needing to be cared for, the key driver is that interactions are framed as helping regulate others' emotions (Dore et al., 2017; Cosley et al., 2010; Taylor, 2011), alongside facilitating a sense of relationship and responsibility for the well-being of the creature (Turkle, 2007; Hayashi & Kato, 2016; Donath, 2004; Lee et al., 2010).
3. Through repeated, soothing, and positive interactions with Purrble over time, it is anticipated that there will be a shift in ER practices and implicit beliefs about emotions (Ford & Gross, 2018), specifically the controllability of one's emotions (Schleider & Weisz, 2016).

## ***Full Measurement Details***

### ***Primary Outcome Measure***

The primary outcome measure in this study is the Difficulties with Emotion Regulation Scale-8 (DERS8) [54]. This will be given to participants as part of the main assessment at all time-points. The DERS8 contains 8 items which represent affect, thoughts, and actions in response to situations which elicit negative emotions. A single total score is calculated from all items, with higher scores indicating more difficulties with emotion.

### ***Mental Health Measures***

Self-harmful thoughts and behaviours will be assessed using the Self-Harm Questionnaire (SHQ) [57]. At baseline, those who indicate experiences of self-harm behaviour will be invited to complete the second section about historical self-harm behaviour. At all other timepoints, only the three screening questions will be presented; these query the frequency of self-harmful thoughts, suicidal ideation, and self-harmful behaviour. The items are scored individually from “no thoughts/behaviour” to “yes, five or more times”. The wording for these items will be adapted from “have you ever...” to “in the last week/month” (depending on assessment point).

Anxiety symptoms will be assessed using the Generalised Anxiety Disorder-7 (GAD-7) [58]. This is a seven-item instrument, used to identify or assess the severity of generalised anxiety disorder. Each item asks the individual to rate the severity of their symptoms over the time period. The total score is calculated by summing all items and ranges from 0-21. Higher scores indicate more severe levels of anxiety symptoms. The wording for these items will be adapted from “over the last two weeks” to “in the last week/month” (depending on assessment point).

Depressive symptoms will be assessed using the Patient Health Questionnaire-9 (PHQ9) [59]. Across nine items, this instrument measures the severity of depressive symptoms, the total score being calculated by summing all items with responses ranging from 0-27. Higher scores indicate greater depressive severity. Again, the wording for these items will be adapted from “over the last two weeks” to “in the last week/month” (depending on assessment point).

### ***Proximal & Mechanistic Measures***

All proximal and mechanistic measures will only be asked at three timepoints (T0, T5, T10), this is to reduce participant burden and encourage engagement, while also obtaining exploratory data to understand the impact of access to Purrble in greater detail. All additional measures total to 18 extra items, adding ~7 minutes to the assessment.

The Process Model of Emotion Regulation Questionnaire [60] is a 45-item measure which considers 10 ER strategies across the five stages of the Process Model of ER, and particularly how these strategies are used to decrease negative emotions. We will include 2 subscales focusing on attention deployment (focusing elsewhere (4 items) and cognitive distraction (5 items)). Each subscale is scored by taking the average of item-level responses.

1  
2  
3  
4  
5  
6  
7  
8  
9  
10  
11  
12  
13  
14  
15  
16  
17  
18  
19  
20  
21  
22  
23  
24  
25  
26  
27  
28  
29  
30  
31  
32  
33  
34  
35  
36  
37  
38  
39  
40  
41  
42  
43  
44  
45  
46  
47  
48  
49  
50  
51  
52  
53  
54  
55  
56  
57  
58  
59  
60

Hopefulness will be assessed using the State Hope Scale [61]. This is a six-item instrument concerning ongoing goal-directed thinking (agency and pathways). The total score (6-48) is calculated by summing responses, with higher scores relating to greater state hopefulness.

Loneliness is assessed using the 3-item UCLA loneliness scale for children [62] to consider participants' subjective loneliness. Items are summed to create a total score (3-12), whereby higher results indicate greater loneliness.

### **Engagement Measures**

Engagement with Purrble will be assessed using two measures; a bespoke survey [53] and an adapted version of Twente Engagement with eHealth Technologies Scale (TWEETS) [63]. These will be deployed as part of the main assessment for participants allocated to the intervention group.

The bespoke survey [53] enquires about Purrble use and perceived usefulness over four items. These are analysed separately, with qualitative responses indicating contexts or situations where Purrble has been found helpful or unhelpful.

TWEETS [63] quantitatively measures intervention engagement across nine items. This is split into subsections considering behaviour, cognitive, and affective engagement. Total scores range from 0-36, with higher scores indicating greater engagement.

## **Safeguarding Procedures**

The safeguarding procedures will be presented to potential participants in the information sheet before they consent to the study. These were codesigned and agreed with Sprouting Minds, based on previous studies conducted with young people with self-harmful experiences (Williams et al., 2021; Williams et al., 2022; Williams et al., in prep; Townsend et al., 2016). To support young people's safety during the study, the following measures will be instituted:

1. Before starting the study, all participants are required to attend an individual study briefing. At this point, they are taken through the study outline, invited to ask questions, and asked to create a safety plan (Brown & Stanley, 2012) with the support of a specially trained researcher. Safety planning is quick to complete, is tangible to participants and has been shown to be effective at reducing self-harmful thoughts and behaviours (Nuiji et al., 2021). Participants keep this safety plan containing their individualised strategies for their personal use beyond the life of the study. During the wellbeing check, participants are asked to reflect on their safety plan if they feel distressed at any other point during the study. This follows safety protocols used in other studies by the researcher (Williams et al., 2021; Williams et al., 2022, pilot studies).
2. During the briefing, participants will need to nominate a support contact (parent, friend over 18 years, GP, etc), with the understanding that if they do not respond to reactive safeguarding (which can be triggered for each of the main assessments), this person will be contacted to ensure that the participant is safe.
  - a. This nominated person will be contacted (via email) to inform them that the participant is taking part in a mental health study and that we will reach out if we are unable to contact the participant following indication that they are at increased risk.
3. All assessments will include signposting to additional supports (e.g., Young Minds, Samaritans, Papyrus) as well as encouraging participants to seek help from their GP if they are distressed.
4. All assessments will include a visual scale to rate mood pre- and post- completing the survey (1 - very distressed - 10 extremely happy). This is to examine whether the assessment process has an impact, positively or negatively, on the participant. Such assessments have been successfully used in prior self-harm research by the research team members as an indicator of assessment impact (Townsend et al., 2016; Williams et al., 2021).
5. Participants in need of support will be identified by checking their responses to the main battery of assessments, within 24 hours. If participants respond that they have had experiences of self-harmful or suicidal thoughts and self-harm behaviour, as well as showing a that the assessment has had a negative impact, they receive a wellbeing call the following day between 1pm-4pm. This allows enough time for the researcher to identify participant risk and inform the PI.
  - a. If the participant does not pick up the phone, they will be contacted via email, asking about their wellbeing, whether they wish to continue with the study, and to arrange a time convenient to complete a wellbeing check. During the wellbeing check, the researcher will be empathic to the difficulties of the participant. The participant will be asked whether they wish to continue the study and, if so, they will update their safety plan with the researcher. If participants do not wish to continue the study, they will be allowed to withdraw with no consequences. They will be invited to interview to discuss their



1  
2  
3 thoughts, opinions and experiences of the study. This would also ask about why they  
4 withdrew from the study.

- 5  
6 b. If a participant still does not respond to the email, the same procedure will be attempted  
7 twice more. If there is still no contact from the participant by day 4, their support contact  
8 (nominated during briefing) will be contacted.

9  
10 Alongside this, all researchers who undertake briefing (including safety planning) and wellbeing calls will  
11 be invited to take part in group supervision sessions once a week during data collection with leading  
12 authors. This will be a confidential, safe space to discuss researchers' wellbeing and mental health, with  
13 support for any difficulties which may surface.  
14  
15  
16  
17  
18  
19  
20  
21  
22  
23  
24  
25  
26  
27  
28  
29  
30  
31  
32  
33  
34  
35  
36  
37  
38  
39  
40  
41  
42  
43  
44  
45  
46  
47  
48  
49  
50  
51  
52  
53  
54  
55  
56  
57  
58  
59  
60

# BMJ Open

## Enhancing emotion regulation with an in-situ socially assistive robot among LGBTQ+ youth with self-harm ideation: Protocol for a randomised controlled trial

|                                 |                                                                                                                                                                                                                                                                                                                                                                                                                                                                                                                                                                                                                                                                                                    |
|---------------------------------|----------------------------------------------------------------------------------------------------------------------------------------------------------------------------------------------------------------------------------------------------------------------------------------------------------------------------------------------------------------------------------------------------------------------------------------------------------------------------------------------------------------------------------------------------------------------------------------------------------------------------------------------------------------------------------------------------|
| Journal:                        | <i>BMJ Open</i>                                                                                                                                                                                                                                                                                                                                                                                                                                                                                                                                                                                                                                                                                    |
| Manuscript ID                   | bmjopen-2023-079801.R1                                                                                                                                                                                                                                                                                                                                                                                                                                                                                                                                                                                                                                                                             |
| Article Type:                   | Protocol                                                                                                                                                                                                                                                                                                                                                                                                                                                                                                                                                                                                                                                                                           |
| Date Submitted by the Author:   | 17-Nov-2023                                                                                                                                                                                                                                                                                                                                                                                                                                                                                                                                                                                                                                                                                        |
| Complete List of Authors:       | Williams, A. Jess; King's College London, Informatics; University of Nottingham, Institute of Mental Health<br>Cleare, Seonaid; University of Glasgow; King's College London, Informatics<br>Borschmann, Rohan; Murdoch Childrens Research Institute; University of Oxford<br>Tench, Christopher; University of Nottingham, Division of Clinical Neuroscience<br>Gross, James; Stanford University<br>Hollis, Chris; University of Nottingham, Division of Psychiatry<br>Chapman-Nisar, Amelia; University of Nottingham<br>Naeche, Nkem; University of Nottingham<br>Townsend, Ellen; University of Nottingham, School of Psychology<br>Slovak, Petr; King's College London; University of Oxford |
| <b>Primary Subject Heading</b>: | Mental health                                                                                                                                                                                                                                                                                                                                                                                                                                                                                                                                                                                                                                                                                      |
| Secondary Subject Heading:      | Mental health                                                                                                                                                                                                                                                                                                                                                                                                                                                                                                                                                                                                                                                                                      |
| Keywords:                       | Suicide & self-harm < PSYCHIATRY, MENTAL HEALTH, Adolescents < Adolescent, Sexual and Gender Minorities, Protocols & guidelines < HEALTH SERVICES ADMINISTRATION & MANAGEMENT, Randomized Controlled Trial                                                                                                                                                                                                                                                                                                                                                                                                                                                                                         |
|                                 |                                                                                                                                                                                                                                                                                                                                                                                                                                                                                                                                                                                                                                                                                                    |

SCHOLARONE™  
Manuscripts

# Enhancing emotion regulation with an in-situ socially assistive robot among LGBTQ+ youth with self-harm ideation: Protocol for a randomised controlled trial

A. Jess Williams, Seonaid Cleare\*, Rohan Borschmann, Christopher Tench, James J Gross, Chris Hollis, Amelia Chapman-Nisar, Nkem Naeche, Ellen Townsend, Petr Slovak, on behalf of Digital Youth

\*Corresponding author: seonaid.cleare@glasgow.ac.uk

Informatics,  
Bush House  
Strand Campus  
King's College London

## Abstract:

**Introduction:** Purrble, a socially assistive robot, was co-designed with children to support in-situ emotion regulation. Preliminary evidence has found that LGBTQ+ youth are receptive to Purrble and find it to be an acceptable intervention to assist with emotion dysregulation and their experiences of self-harm. The present study is designed to evaluate the impact of access to Purrble among LGBTQ+ youth who have self-harmful thoughts, when compared to waitlist controls.

**Methods and analysis:** The study is a single-blind, randomised control trial comparing access to the Purrble robot with waitlist control. A total of 168 LGBTQ+ youth aged 16-25 years with current self-harmful ideation will be recruited, all based within the UK.

The primary outcome is emotion dysregulation (Difficulties with Emotion Regulation Scale-8) measured weekly across a 13-week period, including 3 pre-deployment timepoints.

Secondary outcomes include self-harm (Self-Harm Questionnaire), anxiety (Generalised Anxiety Disorder-7), and depression (Patient Health Questionnaire-9). We will conduct analyses using linear mixed models to assess primary and secondary hypotheses.

Intervention participants will have unlimited access to Purrble over the deployment period, which can be used as much or as little as they like. After all assessments, control participants will receive their Purrble, with all participants keeping the robot after the end of the study.

36 After the study has ended, a subset of participants will be invited to participate in semi-  
37 structured interviews to explore engagement and appropriation of Purrble, considering the  
38 young people's own views of Purrble as an intervention device.

39  
40 **Ethics and dissemination:** Ethical approval was received from King's College London  
41 (RESCM-22/23-34570). Findings will be disseminated in peer review open-access journals  
42 and at academic conferences.

43  
44 **Trial registration number:** Clinical trial gov: NCT06025942

## 45 Strengths and limitations of this study

- 46 - This is the first randomised controlled trial to explore the impact of access of Purrble,  
47 a socially assistive robot, compared to waitlist control on emotion regulation  
48 difficulties within LGBTQ+ youth who have current experiences of self-harmful  
49 ideation.
- 50 - Purrble was co-designed with youth to support emotion regulation in-situ.
- 51 - The study was co-designed with young people who have experience of mental health  
52 difficulties (Sprouting Minds), including a detailed safeguarding procedure.
- 53 - Participants will not be blinded to participant group due to the nature of the  
54 intervention.

## 55 Introduction

56 Self-harm, defined as the intentional poisoning or injury of self, irrespective of intention [1],  
57 is a key health concern among sexual orientation and/or gender identity minorities, LGBTQ+  
58 populations [2]. Internationally, young LGBTQ+ people report higher prevalence of self-  
59 harmful thoughts and behaviours, anxiety, depression, and substance misuse when  
60 compared to their cisgender, heterosexual peers [3-8]. It is well documented that those with  
61 a history of self-harm are at greater risk of suicide [9], and recent evidence indicates that  
62 LGBTQ+ youth are 3-6 times more likely attempt suicide than their cisgender, heterosexual  
63 counterparts [10-11]. Despite the considerable risk of self-harm and associated adverse  
64 outcomes [12-13], there is a lack of evidence-based interventions to support LGBTQ+ youth  
65 struggling with self-harmful thoughts and behaviours.

66  
67 Youth who self-harm often do not seek professional help [14-15], and those that do find  
68 services (e.g., Child and Adolescent Mental Health Services, Accident and Emergency or  
69 social services) to be less helpful sources of support [16] or rarely re-attend services [17].  
70 Factors relating to this can include negative attitudes and behaviours/treatment from health  
71 care staff (e.g., withdrawing pain-reducing medication for wound treatment [18]), concerns  
72 about confidentiality [19], or perceived stigma surrounding self-harm [20-21]. Among  
73 LGBTQ+ people, help-seeking is even more complex, with one in seven avoiding services due  
74 to fears of discrimination on the basis of their sexual orientation or gender identity [22].

75 Therefore, community-based interventions may be more appropriate to support LGBTQ+  
76 youth engaging in self-harm.

77  
78 As LGBTQ+ youth are frequent users of digital technologies [23-26], there is an opportunity  
79 for digital interventions to support those struggling with self-harm and other mental health  
80 difficulties. Evidence suggests that digital interventions support youth to bypass various  
81 barriers to help-seeking, such as lack of accessibility, anticipated stigma, inadequate  
82 resources, and the desire to be self-reliant [27], which are compounded by unique challenges  
83 facing LGBTQ+ youth (e.g., concerns about experiencing stigma or discrimination as a  
84 minority [28]).

85  
86 At present, the field concerning digital interventions among LGBTQ+ youth is small, yet  
87 those available are perceived as feasible, acceptable, and relatively effective [29]. However,  
88 most focus on physical health such as risk reduction or management of sexually transmitted  
89 illnesses (STIs; [29]), with few concerning mental wellbeing [30-33]. These mental health  
90 interventions are typically perceived positively by LGBTQ+ youth [30, 32-34], with mixed  
91 findings reported by the three studies which considered the impact of the intervention on  
92 participants; 1) Rainbow SPARX [32]; 2) an online writing intervention [31]; and 3) QueerViBE  
93 [30]. In their pilot trial, Rainbow SPARX (a didactic PC game using Cognitive Behaviour  
94 Therapy principles) was associated with large reduction for depressive ( $d=1.01$ ) and anxious  
95 ( $d=0.95$ ) symptoms [32]. QueerViBE (a series of brief, interactive videos designed for  
96 transgender and gender diverse youth) found a moderate decrease in psychological distress  
97 ( $d=0.63$ ) when compared to the control group [30]. However, the expressive writing  
98 intervention demonstrated no difference in depressive symptoms in their randomised  
99 controlled trial [31]. Therefore, while limited, digital interventions are feasible, acceptable,  
100 and potentially effective for improving mental health among LGBTQ+ youth. However, there  
101 are currently no evidence-based digital interventions targeting LGBTQ+ youth who struggle  
102 with self-harm.

103  
104 Whilst self-harm among LGBTQ+ youth can be associated with multiple risks, complex  
105 experiences, and unique stressors [35-37], a common issue is often emotional dysregulation  
106 [38-41]. Experiencing difficulties with emotion regulation (ER) is a well-known transdiagnostic  
107 risk factor [42-44], which can be associated with higher risk of self-harm across ages,  
108 settings, and genders [45-46]. Typically, LGBTQ+ populations report greater difficulties with  
109 ER [40-41], which explains in part the association between LGBTQ+ identity and self-harm  
110 [40-41]. Examining how ER can be better supported in young LGBTQ+ people who self-harm  
111 through digital intervention may be a helpful preventative strategy to aid LGBTQ+ youth  
112 broadly.

113  
114 To address this, a pilot study was conducted with LGBTQ+ youth who had recent experiences  
115 of self-harmful thoughts and/or behaviours using an in-situ, emotion regulation intervention

1  
2  
3 116 device, Purrble [47], designed to provide in-the-moment support, see Intervention section  
4 117 for further details. Purrble was originally developed for children in moments of situated  
5 118 distress, but it has since been well-accepted across child and student populations delivering  
6 119 notable benefits for emotion regulation [47-50]. Among a small sample of 21 LGBTQ+ young  
7 120 people, Purrble was found to be a feasible and acceptable intervention with continued device  
8 121 engagement across a 2-week deployment [47]. Notably, access to Purrble was also  
9 122 associated with a reduction in anxiety symptoms and self-harmful thoughts. Qualitative data  
10 123 indicated that this was linked to Purrble supporting ER practices (e.g., grounding, soothing)  
11 124 to prevent young people acting on their self-harmful urges and, in some cases, preventing  
12 125 them from considering self-harm at all [47]. This is the only study to date, which has explored  
13 126 the impact of a socially assistive robot among LGBTQ+ youth, who are at-risk of self-harm  
14 127 [47]. Based on these findings, and Purrble's original design to support in-situ, bottom-up ER  
15 128 [48-49], it appears that mental health outcomes such as anxiety and self-harm [47, 50] are  
16 129 guided by the proximal change in emotion regulation.  
17  
18  
19  
20  
21  
22  
23

24 131 Socially assistive robots (SARs) have previously been used to support children in education  
25 132 [51], family [49] or health settings [52-53], as well as adults with health conditions such as  
26 133 dementia or physical illnesses [54-55]. These studies have shown promising results in the  
27 134 context of motivation, skill development and enhancement, as well as supporting mental  
28 135 health outcomes, e.g., reducing loneliness and stress [49-55]. Similarly, students and at-risk  
29 136 young people have described Purrble robots as a mechanism for comfort and distress relief  
30 137 [47, 50]. However, an ethical challenge raised in SARs literature is the use of these device as a  
31 138 replacement for humans, which could incur negative impacts considering social isolation  
32 139 [56]. Therefore, research utilising SARs should be mindful of this, considering this influence in  
33 140 process analysis, and have additional procedures to prevent overreliance on these devices.  
34  
35  
36  
37  
38  
39

40 142 Although, early data relating to Purrble robots is promising [47], there is a lack of robust  
41 143 quantitative data on the impact of the Purrble robot in a wider sample of LGBTQ+ young  
42 144 people who have self-harmed. Evidence is therefore urgently needed to evaluate the efficacy  
43 145 of Purrble in a) delivering measurable changes in ER when compared to a control group, and  
44 146 b) the extent to which this impacts the frequency of self-harmful thoughts and/or anxiety  
45 147 symptoms.  
46  
47  
48

## 49 148 Study objectives

50  
51 149 **Primary Objective:** The primary objective of this study is to evaluate the impact of having  
52 150 access to the Purrble robot, compared with a waitlist control, on emotion regulation  
53 151 difficulties (DERS8) among LGBTQ+ young people with self-harmful thoughts.  
54  
55

56 152  
57 153 **Secondary Objectives:** The secondary objectives are i) to investigate the impact of having  
58 154 access to Purrble on changes to LGBTQ+ young people's self-harmful thoughts over the trial  
59 155 period, in comparison to a waitlist control group; and ii) to investigate the impact of Purrble  
60

156 on changes in symptoms of anxiety (GAD-7), and symptoms of depression (PHQ-9) over the  
 157 trial period, in comparison to waitlist controls. Finally, this will be the first opportunity to  
 158 assess whether Purrble remains appealing and helpful to LGBTQ+ youth over an extended  
 159 period.

## 160 Methods

### 161 Trial design

162 The study is a 2-arm randomised controlled trial comparing an intervention group (Purrble  
 163 robot) with a waitlist control group. The trial period is across 13 weeks, built of 3 pre-  
 164 deployment assessments and 10 deployment assessments, using weekly, self-reported,  
 165 validated surveys hosted by Qualtrics (see table 1). The intervention period will commence  
 166 once Purrble has been deployed to the intervention group, week 4 (T1).

167

168 **Table 1: Overview of assessment design for both participant groups**

169

| Surveys                             | Pre-deployment<br>(week 1-3) |           |      | Deployment<br>(week 4-13) |    |        | Follow-up<br>(week 13+) |
|-------------------------------------|------------------------------|-----------|------|---------------------------|----|--------|-------------------------|
|                                     | T(-<br>2)                    | T(-<br>1) | T(0) | T1- T4                    | T5 | T6- T9 | T10                     |
| Register<br>interest +<br>screening | X                            |           |      |                           |    |        |                         |
| Consent                             | x                            |           |      |                           |    |        |                         |
| Main<br>assessment                  | x                            | x         |      | x                         |    | x      |                         |
| Extended<br>assessment              |                              |           | x    |                           | x  |        | x                       |
| Qualitative<br>interviews           |                              |           |      |                           |    |        | x                       |

170

171

172 Analyses will be conducted and reported in accordance with the Consolidated Standards of  
 173 Reporting Trials (CONSORT; [57-58]), with consideration given to the recommendation of  
 174 psychological interventions [52]. Outcomes will be assessed 13 times across a 13-week  
 175 period, including 3 baseline assessments and 10 weeks of deployment, with Purrble being  
 176 delivered in time for week 4 (T1).

177

178

179

180

181

182

183

184

185

## 177 Intervention

178 The intervention takes the form of an interactive plush toy-robot (figure 1), which was co-  
179 designed with children to support in-the-moment soothing [48-49]. Purrble is framed as an  
180 anxious creature, in need of care and attention when it feels distressed. This distress is  
181 indicated by a simulated heartbeat using embedded electronics to produce vibration  
182 patterns of i) frantic and anxious, to ii) slow, steady, and relaxed. When held, the device emits  
183 a frantic heartbeat which can be slowed by stroking movements registered by embedded  
184 sensors. Once the device has been "soothed" for long enough, the heartbeat transitions into  
185 a purring vibration, indicating a relaxed state. This transition can be achieved in less than 60  
186 seconds but is dependent on the device-human interaction. Further details on the logic  
187 model underlying Purrble can be found in [supplementary materials 1](#), or see previous  
188 research [49].

[insert figure 1 around here]

**Figure 1: Purrble – socially assistive robot**

## 194 Waitlist – Control

195 The participants in the control group will be on a waitlist throughout the 13-week trial  
196 period. Once data have been collected at the final timepoint (week 13, T10), waitlist  
197 participants will receive a Purrble to keep. Waitlist control group was selected following  
198 discussions with Sprouting Minds members (see Patient and Public Involvement).

## 199 Participants

### 200 Eligibility Criteria

201 When potential participants register their interest for the study, they will be asked  
202 demographic questions relating to the eligibility criteria, providing our information for our  
203 inclusion criteria. These are: i) being between the ages of 16-25 years (inclusive); ii)  
204 identifying as any part of the LGBTQ+ umbrella, iii) having current experiences of self-  
205 harmful thoughts (e.g., in the last month), iv) being able to read, write, and speak English,  
206 and v) living in the UK for the duration of the study. Exclusion criteria are being outside of  
207 the age range, identifying as heterosexual cisgender, not experiencing current self-harmful  
208 thoughts, being unable to understand English and living outside the UK.

### 210 Recruitment, Randomisation, and Blinding

211 LGBTQ+ youth will be recruited to the trial by several strategies. These include: i)  
212 approaching secondary schools and colleges, ii) social media adverts, iii) advertising through  
213 stakeholder charities and organisations (e.g., Bounce Black, Harmless, King's College London



1  
2  
3 214 newsletter), and iv) online platforms (e.g., MQ Participate). Those organisations which involve  
4 215 gatekeepers (e.g., schools, colleges, charities, organisations) will be emailed by one of the  
5 216 leading researchers offering an introductory meeting to discuss the outline of study,  
6 217 explaining safeguarding protocols, and how to share this information with young people.  
7 218 Young LGBTQ+ people will then be able to register their interest in the study, anonymously  
8 219 from gatekeepers. At recruitment, participants will not be blinded to the fact that Purrble was  
9 220 designed to support ER. The information sheet specifies that participants will be asked about  
10 221 mood, self-harm, and ER over the course of the study.  
11  
12  
13  
14  
15

16 223 Once eligibility is confirmed and young LGBTQ+ people have provided written informed  
17 224 consent (supplementary material 2), they will be 1:1 randomly assigned to either intervention  
18 225 or waitlist control group, using a computerised algorithm. A stratification procedure will be  
19 226 applied to balance gender identity (transgender and gender diverse youth vs. cisgender)  
20 227 across the two arms. The researcher conducting randomisation will be blind to treatment  
21 228 group allocation. However, the leading researcher and other team members who will be  
22 229 conducting safeguarding will be aware of group allocation. Researchers collecting outcome  
23 230 measures will be blinded to group allocation. Participants will be informed about their  
24 231 assigned condition. The intervention group will receive the Purrble before T1 data are  
25 232 collected, with waitlist participants receiving their Purrble devices after the 3-month follow-  
26 233 up data collection. Participants may withdraw at any time, once they have received their  
27 234 Purrble device it is theirs to keep.  
28  
29  
30  
31  
32  
33

34 236 In the event of change of circumstance, such as a serious adverse event, participants are  
35 237 asked to inform the research team. Specifically, for follow-up engagements a standard  
36 238 operation protocol which asks that if a situation changes for a young person (e.g., they are  
37 239 hospitalised) that the young person informs the research team. This will be directly asked  
38 240 ("Has your situation changed at all which might impact how you'd like to engage with the  
39 241 study?") via email, with the understanding that the research team will have time to arrange  
40 242 reasonable adjustments (e.g., if a young person still wants to take part but is within an in-  
41 243 patient service).  
42  
43  
44  
45

## 46 244 Power Analysis

47 245 Sample size was determined based on an a-priori power analysis to detect a difference  
48 246 between the two arms when considering the primary outcome measure, the Difficulties with  
49 247 Emotion Regulation Scale-8 (DERS8). On the basis of a pilot with LGBTQ+ youth [47] and  
50 248 other Purrble studies [50, 59], we expect to see a medium effect size for this measure ( $d=0.4$ ).  
51 249 This would indicate fewer difficulties with ER among young people who had access to  
52 250 Purrble.  
53  
54  
55  
56

57 252 With the anticipated medium effect size, simulations were performed involving a range of  
58 253 fixed and random effects. Simulations involved linearly increasing effect over the study  
59 254 period, and sensitivity analysis was performed over a range of scenarios considering the

1  
2  
3 255 slope of effect change over time was either fixed or random. The simulation used a one sided  
4 256 t-test ( $\alpha=0.05$ ), and targeted a sample size giving at least 80% power. The statistic to be  
5 257 compared between groups is the change in mean DERS8 score in the 2 weeks preceding  
6 258 intervention (3 assessments in total), to the mean DERS8 assessed at weeks 8, 9, and 10. The  
7 259 averaging over 3 assessments is intended to reduce the known variance in DERS8 when  
8 260 repeatedly assessed [60]. Other simulations considered only comparing the change in DERS8  
9 261 from baseline (week 0) to week 10, comparing the slope of the effect, assessed using simple  
10 262 linear regression. All simulations suggested better than 60% power with 70 subjects per arm,  
11 263 with the mean change in DERS8 averaged over 3 assessments, and the comparison of slopes,  
12 264 suggesting >80% power. The sample size of 140 is inflated by 20% to account for dropout  
13 265 rate [61], rounding up the total sample to 168.  
14  
15  
16  
17  
18  
19 266

## 21 267 Outcome Measures

22  
23 268 An overview of all measures can be found in Table 2, and full details can be found in  
24 269 [supplementary material 3](#). Primary and mental health measures will be asked at all  
25 270 timepoints, with the Purrble intervention group also receiving two additional engagement  
26 271 measures throughout deployment. An extended survey will replace the weekly survey at  
27 272 three time points, this will include three additional measures to be asked to all participants.  
28 273 All surveys will be distributed via Qualtrics using individualised links for each participant.  
29  
30  
31 274

32  
33 275 These additional measures were selected to explore the association between self-harm and  
34 276 emotion regulation (Process Model Emotion Regulation Questionnaire - PMERQ) [38-41],  
35 277 perceptions of hope (State Hope Scale - SHS) [13], and loneliness (3-item UCLA Loneliness  
36 278 scale) [62], to further explore the qualitative findings represented in our pilot study [47]. Our  
37 279 findings have previously indicated that Purrble was used to i) refocus or distract attention  
38 280 during moments of distress by addressing the physical manifestation of their discomfort  
39 281 (PMERQ), and ii) comfort in moments of loneliness and provide self-soothing mechanisms  
40 282 (UCLA, SHS) [47].  
41  
42  
43  
44 283

45  
46 284 Considering participant burden, young people will be informed of the time to complete each  
47 285 weekly survey (15 minutes), the extended survey (22 minutes) and will be compensated for  
48 286 their time.  
49  
50  
51 287

52 288  
53  
54  
55  
56  
57  
58  
59  
60

289 **Table 2: Summary of the outcome measures**

| Outcome Measure                                               | Questions (n) | Type of outcome | Frequency       | Scoring                                                                    | Details of assessment                                                                  |
|---------------------------------------------------------------|---------------|-----------------|-----------------|----------------------------------------------------------------------------|----------------------------------------------------------------------------------------|
| <b>Primary measure</b>                                        |               |                 |                 |                                                                            |                                                                                        |
| Difficulties in emotion regulation scale-8 DERS8; [60]        | 8             | Primary outcome | All timepoints  | 8-40 (higher = more difficulties)                                          | Difficulties associated with response to situations eliciting negative emotions.       |
| <b>Mental health measures</b>                                 |               |                 |                 |                                                                            |                                                                                        |
| Self-Harm Questionnaire screening questions SHQ; [63]         | 3             | Mental health   | All timepoints  | Analysed separately                                                        | Frequency and risk of self-harm thoughts, suicidal ideation, and behaviour.            |
| Self-Harm Questionnaire additional items SHQ; [63]            | 22            | Covariate       | Once (baseline) | Analysed separately                                                        | 4 dimensions of self-harm (NSSI, suicide attempts, suicide threats, suicide ideation). |
| Generalised Anxiety Disorder questionnaire GAD-7; [64]        | 7             | Mental health   | All timepoints  | 0-21 (higher = greater severity)                                           | Presence and severity of generalized anxiety disorder                                  |
| Patient Health Questionnaire PHQ-9; [65]                      | 9             | Mental health   | All timepoints  | 0-27 (higher = greater severity)                                           | Severity of depressive symptoms                                                        |
| <b>Proximal &amp; mechanistic measures</b>                    |               |                 |                 |                                                                            |                                                                                        |
| Process Model of Emotion Regulation Questionnaire PMERQ; [66] | 9             | Mechanistic     | 3 timepoints    | 2 subscales<br>Average across each subscale, higher = greater endorsement. | Attentional deployment subscales; focus on engagement and disengagement.               |
| State Hope Scale SHS; [67]                                    | 6             | Proximal        | 3 timepoints    | 6-48 (higher = greater state hopefulness)                                  | Goal-directed thinking; agency and pathways.                                           |
| UCLA Loneliness scale for children; [68]                      | 3             | Proximal        | 3 timepoints    | 3-12 (higher = more loneliness)                                            | Subjective feelings of loneliness.                                                     |

| <b>Engagement measures</b>                                     |   |            |            |                                                              |                                                                                         |
|----------------------------------------------------------------|---|------------|------------|--------------------------------------------------------------|-----------------------------------------------------------------------------------------|
| Bespoke Purrble questions; [59]                                | 7 | Engagement | Deployment | Analysed separately                                          | Purrble use and perceived usefulness.                                                   |
| Twente Engagement With eHealth Technologies Scale TWEETS; [69] | 9 | Engagement | Deployment | 3 subscales<br>Total score per subscale = greater engagement | Engagement with intervention device; behavioural, cognitive, and affective engagements. |

290

## 291 Post deployment Interviews

292 We will collect semi-structured interview data from LGBTQ+ young people from up to 40%  
 293 of the intervention group (n=37), and approximately 20% of the control group (n=17). The  
 294 interviews will be conducted following the deployment period. We will specifically aim to  
 295 recruit young people who demonstrated the highest and lowest changes in the outcome  
 296 data over the trial to explore and understand the potential moderators relating to the  
 297 intervention and mental health across the trial period.

298

299 The semi-structured interview will explore the engagement and appropriation of the Purrble  
 300 device, whether LGBTQ+ young people had felt that this had helped them with their ER,  
 301 mental health more broadly, or self-harmful thoughts, and how Purrble may (or may not) be  
 302 suitable for other audiences. We will compare these experiences between intervention and  
 303 control participants, exploring other mechanisms used by LGBTQ+ youth who experience  
 304 self-harm.

## 305 Hypotheses

### 306 **Primary hypothesis**

307 Across the trial, we hypothesise that access to the Purrble intervention (compared to the  
 308 waitlist control) will lead to a direct decrease in self-reported difficulties with emotion  
 309 regulation as measured by the primary outcome (DERS8), averaged between three pre-  
 310 deployment (weeks 1-3) and our final three deployment assessments (weeks 11-13).

311

### 312 **Secondary hypothesis**

313 Intervention effects will be moderated by engagement with the device, measured by  
 314 bespoke questions and the TWEETS questionnaire. Secondary outcomes in the Purrble  
 315 effectiveness trial are: self-harmful thoughts, symptoms of anxiety, and symptoms of

1  
2  
3 316 depression. These three constructs were selected as secondary outcomes based on the high  
4 317 prevalence of these experiences among LGBTQ+ youth [3-8] and their association with poor  
5 318 ER [38-41]. The three secondary hypotheses are as listed when compared to waitlist controls:  
6  
7 319 1. Engagement with the Purrble intervention will reduce the frequency of self-reported  
8 self-harmful thoughts (SHQ).  
9 320  
10 321 2. Engagement with the Purrble intervention will reduce the severity of self-reported  
11 anxiety symptoms (GAD-7).  
12 322  
13 323 3. Engagement with the Purrble intervention will reduce the severity of self-reported  
14 depression symptoms (PHQ-9).  
15 324

### 17 325 **Additional analyses**

18  
19 326 Additional hypotheses aim to understand the impact of Purrble on relevant proximal and  
20 327 mechanistic outcomes. The following hypotheses will be investigated across the trial:  
21  
22 328 1. Greater within-group changes will be seen among intervention group participants, with  
23 329 increasing levels of endorsement for attentional deployment (PMERQ), than among those  
24 330 participants of the control group.  
25  
26 331 2. There will be a greater increase in state hopefulness (SHS) in the Purrble intervention  
27 332 group than the waitlist control.  
28  
29 333 3. Participants in the Purrble intervention group will report lower loneliness (UCLA) than  
30 334 those in the waitlist control group.  
31  
32 335

### 34 336 **Statistical analyses**

35  
36 337 Testing the hypothesis that access to the Purrble intervention will lead to a reduction in  
37 338 emotion dysregulation, as measured by the composite primary outcome, will be done using  
38 a one-sided t-test.  
39 339

40 340  
41 341 As exploratory analyses linear mixed models will be fitted to gain insight into how emotion  
42 342 dysregulation is altered with access to the intervention. In particular, we will regress the  
43 343 weekly outcome score on an indicator for the Purrble condition, a linear time trend, and an  
44 interaction between the treatment indicator and time to examine differential trends in the  
45 344 two groups. We will adjust for baseline covariates and include participant-level random  
46 345 intercepts and slopes to account for persistent baseline differences between young people  
47 346 as well as person-specific time trends in the outcome. While the outcome is limited to DERS8  
48 347 scores ranging from 8-40, we will model it as continuous data.  
49 348  
50 349

51  
52  
53  
54 350 For secondary aims, we will use analogous linear mixed models to assess the impact of  
55 351 Purrble on relevant outcomes (cf., hypotheses above), adding baseline DERS8 as another  
56 352 covariate. We will not adjust for multiple comparisons, as these are exploratory aims meant  
57 353 to be hypothesis-generating. Similarly, we will also assess the impact of access to Purrble on  
58  
59  
60

1  
2  
3 354 changes in proximal outcomes, as well as explore whether these appear to moderate  
4 355 changes on primary and secondary outcomes.

## 8 356 Patient and Public Involvement

9  
10 357 The study design was discussed with, and approved by, Sprouting Minds members (MRC  
11 358 Digital Youth Young Person Advisory group), with specific input considering the intervention  
12 359 arms and safeguarding procedures. These young people highlighted that "waitlist control"  
13 360 conditions mimic clinical experiences of waiting for services, therefore this was considered an  
14 361 acceptable and realistic control. Whereas safeguarding procedures needed to balance  
15 362 participant autonomy and ensuring safe research.

## 19 363 Ethics and dissemination

20 364 This manuscript has been written with insights from the Spirit 2013 checklist (supplementary  
21 365 material 4). The study will be conducted according to local regulations and the Declaration of  
22 366 Helsinki of 1975, revised in 2008. The Ethical Committee at King's College London, UK  
23 367 approved the study (RESCM-22/23-34570). Written consent will be obtained from all  
24 368 participants prior to commencing their involvement in the study, with explicit understanding  
25 369 of the study and safeguarding procedures (see supplementary materials 5) being obtained  
26 370 during study briefing sessions. The trial is registered with ClinicalTrials.gov (NCT06025942).

27 371  
28 372 We aim for our findings (and any modifications to this protocol) to be disseminated across  
29 373 academic fields (human-computer interactions, psychology, implementation sciences),  
30 374 alongside showcasing the findings to LGBTQ+ youth, community groups, and wider  
31 375 stakeholders. This will be achieved through presentations at national and international  
32 376 conferences, peer-reviewed journal publications, community outreach and PPI events. During  
33 377 dissemination, we will be liaising with youth populations to establish next steps for this  
34 378 research, considering additional co-design of materials to sit around/alongside Purrble.

## 43 379 Acknowledgements

44 380 The authors (AJW, ET, NN, ACN, CH, PS) acknowledge the support of the UK Research and  
45 381 Innovation (UKRI) Digital Youth Programme award [MRC project reference MR/W002450/1]  
46 382 which is part of the AHRC/ESRC/MRC Adolescence, Mental Health and the Developing Mind  
47 383 programme. The authors would like to thank our PPI group Sprouting Minds, including the  
48 384 two co-chairs, Sarah Doherty and Lucy-Paige Willingham, for their ongoing support and  
49 385 contributions to the project. RB receives salary and research support from an Australian  
50 386 National Health and Medical Research Council (NHMRC) Emerging Leadership Investigator  
51 387 Grant (EL2; GNT2008073).

52 388 We would also like to thank Mathijs Lucassen for his input while developing this trial.

53 389  
54  
55  
56  
57  
58  
59  
60

## 390 Author contributions

391 AJW, ET, PS conceived the study. AJW and PS designed the study, with statistical expertise  
392 from CT and patient and public input from NN and ACN. AJW designed the study materials,  
393 which were reviewed with feedback between NN, ACN, and SC. AJW obtained ethical  
394 approval. JG, ET, PS and AJW contributed to measure selection. AJW drafted the first version  
395 of the protocol manuscript for publication, with input from all authors (AJW, RB, SC, ET, NN,  
396 ACN, CH, PS). RB and AJW revised the submitted protocol manuscript together.

## 398 Funding

399 This study is funded by the UKRI MRC Digital Youth (MR/W002450/1) and the UKRI Future  
400 Leaders Fellowship (MR/T041897/1). Funders have no involvement with the study design,  
401 data collection, management, analysis, interpretation or dissemination. This is now included.

## 402 Competing interests statement

403 PS has been involved in the development of what is now Purrble as part of his postdoctoral  
404 fellowship; and serves as a paid research adviser to the Committee for Children but has no  
405 financial stake in either CfC (Purrble brand owners) or Sproutel (company manufacturing  
406 Purrbles). Neither Committee for Children nor Sproutel had access to the data or had been  
407 part of the data collection in any way, nor did they approve or see the publication before it  
408 was submitted. There were no conflicting interests among the remaining research team.

## 410 Data availability statement

411 Data will be available upon reasonable request once the trial is complete. To date there is no  
412 data that has been collected or analysed for this study. The data will be held at King's  
413 College London, following the data management agreement of Digital Youth.

## 415 References:

- 416 1. Kendall T, Taylor C, Bhatti H, Chan M, Kapur N. Longer term management of self  
417 harm: summary of NICE guidance. *Bmj*. 2011 Nov 23;343. doi.org/10.1136/bmj.d7073
- 418 2. World Health Organisation. Suicide [fact sheet] [Internet]. World Health Organization;  
419 2021 [cited 2023 Mar 24]. Available from: [https://www.who.int/news-room/fact-](https://www.who.int/news-room/fact-sheets/detail/suicide)  
420 [sheets/detail/suicide](https://www.who.int/news-room/fact-sheets/detail/suicide)
- 421 3. Coker TR, Austin SB, Schuster MA. The health and health care of lesbian, gay, and  
422 bisexual adolescents. *Annual review of public health*. 2010 Apr 21;31:457-77.  
423 doi.org/10.1146/annurev.publhealth.012809.103636
- 424 4. Haas AP, Eliason M, Mays VM, Mathy RM, Cochran SD, D'Augelli AR, Silverman MM,  
425 Fisher PW, Hughes T, Rosario M, Russell ST. Suicide and suicide risk in lesbian, gay,

- 1  
2  
3 426 bisexual, and transgender populations: Review and recommendations. *Journal of*  
4 427 homosexuality. 2010 Dec 30;58(1):10-51. DOI: 10.1080/00918369.2011.534038
- 5  
6 428 5. Marshal MP, Dietz LJ, Friedman MS, Stall R, Smith HA, McGinley J, Thoma BC, Murray  
7 429 PJ, D'Augelli AR, Brent DA. Suicidality and depression disparities between sexual  
8 430 minority and heterosexual youth: A meta-analytic review. *Journal of adolescent*  
9 431 health. 2011 Aug 1;49(2):115-23. doi.org/10.1016/j.jadohealth.2011.02.005
- 10  
11 432 6. Saewyc EM. Research on adolescent sexual orientation: Development, health  
12 433 disparities, stigma, and resilience. *Journal of research on adolescence*. 2011  
13 434 Mar;21(1):256-72. doi.org/10.1111/j.1532-7795.2010.00727.x
- 14  
15 435 7. McDermott E, Hughes E, Rawlings V. Norms and normalisation: understanding  
16 436 lesbian, gay, bisexual, transgender and queer youth, suicidality and help-seeking.  
17 437 *Culture, Health & Sexuality*. 2017 Feb 1;20(2):156-72.  
18 438 doi.org/10.1080/13691058.2017.1335435
- 19  
20 439 8. Irish M, Solmi F, Mars B, King M, Lewis G, Pearson RM, Pitman A, Rowe S, Srinivasan R,  
21 440 Lewis G. Depression and self-harm from adolescence to young adulthood in sexual  
22 441 minorities compared with heterosexuals in the UK: a population-based cohort study.  
23 442 *The Lancet Child & Adolescent Health*. 2019 Feb 1;3(2):91-8. doi.org/10.1016/S2352-  
24 443 4642(18)30343-2
- 25  
26 444 9. Chan MK, Bhatti H, Meader N, Stockton S, Evans J, O'Connor RC, Kapur N, Kendall T.  
27 445 Predicting suicide following self-harm: systematic review of risk factors and risk  
28 446 scales. *The British Journal of Psychiatry*. 2016 Oct;209(4):277-83. doi:  
29 447 10.1192/bjp.bp.115.170050
- 30  
31 448 10. Di Giacomo E, Krausz M, Colmegna F, Aspesi F, Clerici M. Estimating the risk of  
32 449 attempted suicide among sexual minority youths: a systematic review and meta-  
33 450 analysis. *JAMA pediatrics*. 2018 Dec 1;172(12):1145-52.  
34 451 doi:10.1001/jamapediatrics.2018.2731
- 35  
36 452 11. Marchi M, Arcolin E, Fiore G, Travascio A, Uberti D, Amaddeo F, Converti M, Fiorillo A,  
37 453 Mirandola M, Pinna F, Ventriglio A. Self-harm and suicidality among LGBTIQ people: a  
38 454 systematic review and meta-analysis. *International review of psychiatry*. 2022 May  
39 455 19;34(3-4):240-56. doi.org/10.1080/09540261.2022.2053070
- 40  
41 456 12. Warne N, Heron J, Mars B, Solmi F, Biddle L, Gunnell D, Hammerton G, Moran P,  
42 457 Munafò M, Penton-Voak I, Skinner A. Emotional dysregulation in childhood and  
43 458 disordered eating and self-harm in adolescence: prospective associations and  
44 459 mediating pathways. *Journal of child psychology and psychiatry*. 2023 May;64(5):797-  
45 460 806. doi.org/10.1111/jcpp.13738
- 46  
47 461 13. Mars B, Heron J, Klonsky ED, Moran P, O'Connor RC, Tilling K, Wilkinson P, Gunnell D.  
48 462 Predictors of future suicide attempt among adolescents with suicidal thoughts or  
49 463 non-suicidal self-harm: a population-based birth cohort study. *The Lancet Psychiatry*.  
50 464 2019 Apr 1;6(4):327-37. doi.org/10.1016/S2215-0366(19)30030-6
- 51  
52 465 14. Geulayov G, Casey D, McDonald KC, Foster P, Pritchard K, Wells C, Clements C, Kapur  
53 466 N, Ness J, Waters K, Hawton K. Incidence of suicide, hospital-presenting non-fatal  
54 467 self-harm, and community-occurring non-fatal self-harm in adolescents in England  
55 468 (the iceberg model of self-harm): a retrospective study. *The Lancet Psychiatry*. 2018  
56 469 Feb 1;5(2):167-74. doi.org/10.1016/S2215-0366(17)30478-9



- 1  
2  
3 470 15. Geulayov G, Borschmann R, Mansfield KL, Hawton K, Moran P, Fazel M. Utilization and  
4 471 acceptability of formal and informal support for adolescents following self-harm  
5 472 before and during the first COVID-19 lockdown: results from a large-scale English  
6 473 schools survey. *Frontiers in psychiatry*. 2022 Jun 24;13:881248.  
7 474 doi.org/10.3389/fpsyt.2022.881248  
8  
9 475 16. Holland J, Sayal K, Berry A, Sawyer C, Majumder P, Vostanis P, Armstrong M, Harroe C,  
10 476 Clarke D, Townsend E. What do young people who self-harm find helpful? A  
11 477 comparative study of young people with and without experience of being looked  
12 478 after in care. *Child and adolescent mental health*. 2020 Sep;25(3):157-64.  
13 479 Doi.org/10.1111/camh.12384  
14  
15 480 17. Michelmore L, Hindley P. Help-seeking for suicidal thoughts and self-harm in young  
16 481 people: A systematic review. *Suicide and Life-Threatening Behavior*. 2012  
17 482 Oct;42(5):507-24. doi.org/10.1111/j.1943-278X.2012.00108.x  
18  
19 483 18. Owens C, Hansford L, Sharkey S, Ford T. Needs and fears of young people presenting  
20 484 at accident and emergency department following an act of self-harm: secondary  
21 485 analysis of qualitative data. *The British Journal of Psychiatry*. 2016 Mar;208(3):286-91.  
22 486 doi.org/10.1192/bjp.bp.113.141242  
23  
24 487 19. Williams AJ, Nielsen E, Coulson NS. "They aren't all like that": Perceptions of clinical  
25 488 services, as told by self-harm online communities. *Journal of health psychology*. 2020  
26 489 Nov;25(13-14):2164-77. doi.org/10.1177/13591053187884  
27  
28 490 20. Long M, Manktelow R, Tracey A. We are all in this together: working towards a holistic  
29 491 understanding of self-harm. *Journal of Psychiatric and Mental Health Nursing*. 2013  
30 492 Mar;20(2):105-13. doi.org/10.1111/j.1365-2850.2012.01893.x  
31  
32 493 21. Bathje G, Pryor J. The relationships of public and self-stigma to seeking mental health  
33 494 services. *Journal of Mental Health Counseling*. 2011 Apr 1;33(2):161-76.  
34 495 doi.org/10.17744/mehc.33.2.g632039274160411  
35  
36 496 22. Stonewall. LGBT in Britain Health Report [Internet]. Stonewall; 2018 [cited 2023 Mar  
37 497 24]. Available from:  
38 498 [https://www.stonewall.org.uk/system/files/lgbt\\_in\\_britain\\_health.pdf](https://www.stonewall.org.uk/system/files/lgbt_in_britain_health.pdf)  
39  
40 499 23. Steinke J, Root-Bowman M, Estabrook S, Levine DS, Kantor LM. Meeting the needs of  
41 500 sexual and gender minority youth: formative research on potential digital health  
42 501 interventions. *Journal of Adolescent Health*. 2017 May 1;60(5):541-8.  
43 502 doi.org/10.1016/j.jadohealth.2016.11.023  
44  
45 503 24. Bowen D, Jabson J, Kamen C. mHealth: an avenue for promoting health among sexual  
46 504 and gender minority populations?. *Mhealth*. 2016;2. doi:  
47 505 10.21037/mhealth.2016.09.01  
48  
49 506 25. Strauss P, Morgan H, Toussaint DW, Lin A, Winter S, Perry Y. Trans and gender diverse  
50 507 young people's attitudes towards game-based digital mental health interventions: A  
51 508 qualitative investigation. *Internet Interventions*. 2019 Dec 1;18:100280.  
52 509 Doi.org/10.1016/j.invent.2019.100280  
53  
54 510 26. Craig SL, McInroy L. You can form a part of yourself online: The influence of new  
55 511 media on identity development and coming out for LGBTQ youth. *Journal of Gay &  
56 512 Lesbian Mental Health*. 2014 Jan 1;18(1):95-109.  
57 513 doi.org/10.1080/19359705.2013.777007

- 1  
2  
3 514 27. Gulliver A, Griffiths KM, Christensen H. Perceived barriers and facilitators to mental  
4 515 health help-seeking in young people: a systematic review. *BMC psychiatry*. 2010  
5 516 Dec;10(1):1-9. doi.org/10.1186/1471-244X-10-113  
6  
7 517 28. McIntyre J, Daley A, Rutherford K, Ross LE. Systems-level barriers in accessing  
8 518 supportive mental health services for sexual and gender minorities: Insights from the  
9 519 provider's perspective. *Canadian Journal of Community Mental Health*. 2012 Mar  
10 520 22;30(2):173-86. doi.org/10.7870/cjcmh-2011-0023  
11  
12 521 29. Gilbey D, Morgan H, Lin A, Perry Y. Effectiveness, acceptability, and feasibility of  
13 522 digital health interventions for LGBTIQ+ young people: systematic review. *Journal of*  
14 523 *medical Internet research*. 2020 Dec 3;22(12):e20158. doi:10.2196/20158  
15  
16 524 30. Martin S. *Developing and evaluating QueerViBE: an online intervention to empower*  
17 525 *trans and non-binary youth* (Doctoral dissertation, Anglia Ruskin University). [cited  
18 526 2023 Mar 24].  
19  
20 527 31. Pachankis JE, Goldfried MR. Expressive writing for gay-related stress: psychosocial  
21 528 benefits and mechanisms underlying improvement. *Journal of consulting and clinical*  
22 529 *psychology*. 2010 Feb;78(1):98. Doi.org/10.1037/a0017580  
23  
24 530 32. Lucassen MF, Merry SN, Hatcher S, Frampton CM. Rainbow SPARX: A novel approach  
25 531 to addressing depression in sexual minority youth. *Cognitive and Behavioral Practice*.  
26 532 2015 May 1;22(2):203-16. Oi.org/10.1016/j.cbpra.2013.12.008  
27  
28 533 33. Fleming JB, Hill YN, Burns MN. Usability of a culturally informed mHealth intervention  
29 534 for symptoms of anxiety and depression: feedback from young sexual minority men.  
30 535 *JMIR human factors*. 2017 Aug 25;4(3):e7392. doi: 10.2196/humanfactors.7392  
31  
32 536 34. Fish JN, Williams ND, McInroy LB, Pacey MS, Edsall RN, Devadas J, Henderson SB,  
33 537 Levine DS. Q Chat Space: assessing the feasibility and acceptability of an internet-  
34 538 based support program for LGBTQ youth. *Prevention science*. 2021 Sep 6:1-2.  
35 539 doi.org/10.1007/s11121-021-01291-y  
36  
37 540 35. Williams AJ, Arcelus J, Townsend E, Michail M. Feasibility and acceptability of  
38 541 experience sampling among LGBTQ+ young people with self-harmful thoughts and  
39 542 behaviours. *Frontiers in psychiatry*. 2022 Aug 17;13:916164.  
40 543 Doi.org/10.3389/fpsy.2022.916164  
41  
42 544 36. Williams AJ, Arcelus J, Townsend E, Michail M. Understanding the processes  
43 545 underlying self-harm ideation and behaviors within LGBTQ+ young people: A  
44 546 qualitative study. *Archives of suicide research*. 2021 Apr 3;27(2):380-96.  
45 547 doi.org/10.1080/13811118.2021.2003273  
46  
47 548 37. Hatchel T, Polanin JR, Espelage DL. Suicidal thoughts and behaviors among LGBTQ  
48 549 youth: Meta-analyses and a systematic review. *Archives of suicide research*. 2019 Jan  
49 550 2;25(1):1-37. doi.org/10.1080/13811118.2019.1663329  
50  
51 551 38. Chen WL, Chun CC. Association between emotion dysregulation and distinct groups  
52 552 of non-suicidal self-injury in Taiwanese female adolescents. *International journal of*  
53 553 *environmental research and public health*. 2019 Sep;16(18):3361.  
54 554 Doi.org/10.3390/ijerph16183361  
55  
56 555 39. Clapham R, Brausch A. Internalizing and externalizing symptoms moderate the  
57 556 relationship between emotion dysregulation and suicide ideation in adolescents.

- 1  
2  
3 557 Child Psychiatry & Human Development. 2022 Sep 6:1-2. doi.org/10.1007/s10578-  
4 558 022-01413-9  
5  
6 559 40. Kapatais A, Williams AJ, Townsend E. The mediating role of emotion regulation on  
7 560 self-harm among gender identity and sexual orientation minority (LGBTQ+)  
8 561 individuals. Archives of suicide research. 2023 Apr 3;27(2):165-78.  
9 562 doi.org/10.1080/13811118.2022.2064254  
10  
11 563 41. Fraser G, Wilson MS, Garisch JA, Robinson K, Brocklesby M, Kingi T, O'Connell A,  
12 564 Russell L. Non-suicidal self-injury, sexuality concerns, and emotion regulation among  
13 565 sexually diverse adolescents: A multiple mediation analysis. Archives of suicide  
14 566 research. 2018 Jul 3;22(3):432-52. doi.org/10.1080/13811118.2017.1358224  
15  
16 567 42. Sloan E, Hall K, Moulding R, Bryce S, Mildred H, Staiger PK. Emotion regulation as a  
17 568 transdiagnostic treatment construct across anxiety, depression, substance, eating and  
18 569 borderline personality disorders: A systematic review. Clinical psychology review.  
19 570 2017 Nov 1;57:141-63. Doi.org/10.1016/j.cpr.2017.09.002  
20  
21 571 43. Gross JJ. Emotion regulation: Current status and future prospects. Psychological  
22 572 inquiry. 2015 Jan 2;26(1):1-26. doi.org/10.1080/1047840X.2014.940781  
23  
24 573 44. Fernandez KC, Jazaieri H, Gross JJ. Emotion regulation: A transdiagnostic perspective  
25 574 on a new RDoC domain. Cognitive therapy and research. 2016 Jun;40:426-40.  
26 575 doi.org/10.1007/s10608-016-9772-2  
27  
28 576 45. Wolff JC, Thompson E, Thomas SA, Nesi J, Bettis AH, Ransford B, Scopelliti K, Frazier  
29 577 EA, Liu RT. Emotion dysregulation and non-suicidal self-injury: A systematic review  
30 578 and meta-analysis. European Psychiatry. 2019 Jun;59:25-36.  
31 579 Doi.org/10.1016/j.eurpsy.2019.03.004  
32  
33 580 46. Fox KR, Franklin JC, Ribeiro JD, Kleiman EM, Bentley KH, Nock MK. Meta-analysis of  
34 581 risk factors for nonsuicidal self-injury. Clinical psychology review. 2015 Dec 1;42:156-  
35 582 67. Doi.org/10.1016/j.cpr.2015.09.002  
36  
37 583 47. Williams, AJ, Townsend, T, Naeche, N, Chapman-Nisar, A, Hollis, C, Slovak, P.  
38 584 Investigating the feasibility, acceptability and appropriation of a socially assistive  
39 585 robot among minority youth at-risk of self-harm. [in prep]  
40  
41 586 48. Slovák P, Theofanopoulou N, Cecchet A, Cottrell P, Altarriba Bertran F, Dagan E,  
42 587 Childs J, Isbister K. " I just let him cry... Designing Socio-Technical Interventions in  
43 588 Families to Prevent Mental Health Disorders. Proceedings of the ACM on Human-  
44 589 Computer Interaction. 2018 Nov 1;2(CSCW):1-34. Doi.org/10.1145/3274429  
45  
46 590 49. Theofanopoulou N, Isbister K, Edbrooke-Childs J, Slovák P. A smart toy intervention  
47 591 to promote emotion regulation in middle childhood: Feasibility study. JMIR mental  
48 592 health. 2019 Aug 5;6(8):e14029. doi: 10.2196/14029  
49  
50 593 50. Williams AJ, Freed M, Theofanopoulou N, Roquet CD, Klasnja P, Gross JJ, Schleider J,  
51 594 Slovak P. Feasibility, perceived impact, and acceptability of a socially assistive robot to  
52 595 support emotion regulation with highly anxious university students: an open trial.  
53 596 JMIR Mental Health. 2023. [in prep]  
54  
55 597 51. Papadopoulos I, Lazzarino R, Miah S, Weaver T, Thomas B, Koulouglioti C. A  
56 598 systematic review of the literature regarding socially assistive robots in pre-tertiary  
57 599 education. Computers & Education. 2020 Oct 1;155:103924.  
58  
59 600 doi.org/10.1016/j.compedu.2020.103924  
60

- 1  
2  
3 601 52. Crossman MK, Kazdin AE, Kitt ER. The influence of a socially assistive robot on mood,  
4 602 anxiety, and arousal in children. *Professional Psychology: Research and Practice*. 2018  
5 603 Feb;49(1):48. doi.org/10.1037/pro0000177  
6  
7 604 53. Kabacińska K, Prescott TJ, Robillard JM. Socially assistive robots as mental health  
8 605 interventions for children: A scoping review. *International Journal of Social Robotics*.  
9 606 2021 Aug;13:919-35. doi.org/10.1007/s12369-020-00679-0  
10  
11 607 54. Šabanović S, Chang WL, Bennett CC, Piatt JA, Hakken D. A robot of my own:  
12 608 participatory design of socially assistive robots for independently living older adults  
13 609 diagnosed with depression. In *Human Aspects of IT for the Aged Population. Design  
14 610 for Aging: First International Conference, ITAP 2015, Held as Part of HCI International  
15 611 2015, Los Angeles, CA, USA, August 2-7, 2015. Proceedings, Part I 1 2015 (pp. 104-  
16 612 114)*. Springer International Publishing. doi.org/10.1007/978-3-319-20892-3\_11  
17  
18 613 55. Koh WQ, Ang FX, Casey D. Impacts of low-cost robotic pets for older adults and  
19 614 people with dementia: scoping review. *JMIR rehabilitation and assistive technologies*.  
20 615 2021 Feb 12;8(1):e25340. doi: 10.2196/25340  
21  
22 616 56. Koh WQ, Vandemeulebroucke T, Gastmans C, Miranda R, Van den Block L. The ethics  
23 617 of pet robots in dementia care settings: Care professionals' and organisational  
24 618 leaders' ethical intuitions. *Frontiers in psychiatry*. 2023 Jan 23;14:1052889.  
25 619 doi.org/10.3389/fpsy.2023.1052889  
26  
27 620 57. Schulz KF, Altman DG, Moher D, CONSORT Group\*. CONSORT 2010 statement:  
28 621 updated guidelines for reporting parallel group randomized trials. *Annals of internal  
29 622 medicine*. 2010 Jun 1;152(11):726-32. doi.org/10.7326/0003-4819-152-11-  
30 623 201006010-00232  
31  
32 624 58. Montgomery P, Grant S, Mayo-Wilson E, Macdonald G, Michie S, Hopewell S, Moher  
33 625 D. Reporting randomised trials of social and psychological interventions: the  
34 626 CONSORT-SPI 2018 Extension. *Trials*. 2018 Dec;19(1):1-4. doi.org/10.1186/s13063-  
35 627 018-2733-1  
36  
37 628 59. Daudén Roquet C, Theofanopoulou N, Freeman JL, Schleider J, Gross JJ, Davis K,  
38 629 Townsend E, Slovak P. Exploring Situated & Embodied Support for Youth's Mental  
39 630 Health: Design Opportunities for Interactive Tangible Device. In *Proceedings of the  
40 631 2022 CHI Conference on Human Factors in Computing Systems 2022 Apr 29 (pp. 1-  
41 632 16)*. doi.org/10.1145/3491102.3502135  
42  
43 633 60. Penner F, Steinberg L, Sharp C. The Development and Validation of the Difficulties in  
44 634 Emotion Regulation Scale-8: Providing Respondents with a Uniform Context That  
45 635 Elicits Thinking About Situations Requiring Emotion Regulation. *Journal of Personality  
46 636 Assessment*. 2022 Oct 7:1-0. Doi.org/10.1080/00223891.2022.2133722  
47  
48 637 61. Cohen KA, Schleider JL. Adolescent dropout from brief digital mental health  
49 638 interventions within and beyond randomized trials. *Internet Interventions*. 2022 Mar  
50 639 1;27:100496. Doi.org/10.1016/j.invent.2022.100496  
51  
52 640 62. Shaw RJ, Cullen B, Graham N, Lyall DM, Mackay D, Okolie C, Pearsall R, Ward J, John  
53 641 A, Smith DJ. Living alone, loneliness and lack of emotional support as predictors of  
54 642 suicide and self-harm: A nine-year follow up of the UK Biobank cohort. *Journal of  
55 643 Affective Disorders*. 2021 Jan 15;279:316-23. Doi.org/10.1016/j.jad.2020.10.026  
56  
57  
58  
59  
60

- 1  
2  
3 644 63. Ougrin D, Boege I. Brief report: the Self Harm Questionnaire: a new tool designed to  
4 645 improve identification of self harm in adolescents. *Journal of adolescence*. 2013 Feb  
5 646 1;36(1):221-5. Doi.org/10.1016/j.adolescence.2012.09.006  
6 647  
7 647 64. Spitzer RL, Kroenke K, Williams JB, Löwe B. A brief measure for assessing generalized  
8 648 anxiety disorder: the GAD-7. *Archives of internal medicine*. 2006 May  
9 649 22;166(10):1092-7. doi:10.1001/archinte.166.10.1092  
10 650  
11 650 65. Kroenke K, Spitzer RL, Williams JB. The PHQ-9: validity of a brief depression severity  
12 651 measure. *Journal of general internal medicine*. 2001 Sep;16(9):606-13.  
13 652 doi.org/10.1046/j.1525-1497.2001.016009606.x  
14 653  
15 653 66. Olderbak S, Uusberg A, MacCann C, Pollak KM, Gross JJ. The Process Model of  
16 654 Emotion Regulation Questionnaire: assessing individual differences in strategy stage  
17 655 and orientation. *Assessment*. 2022 Dec 9:10731911221134601.  
18 656  
19 656 67. Snyder CR, Simpson SC, Ybasco FC, Borders TF, Babyak MA, Higgins RL. Development  
20 657 and validation of the State Hope Scale. *Journal of personality and social psychology*.  
21 658 1996 Feb;70(2):321. doi.org/10.1037/0022-3514.70.2.321  
22 659  
23 659 68. Testing of loneliness questions in surveys - Office for National Statistics [Internet].  
24 660 Ons.gov.uk. 2018. Available from:  
25 661 <https://www.ons.gov.uk/peoplepopulationandcommunity/wellbeing/compendium/nationalmeasurementofloneliness/2018/testingoflonelinessquestionsinsurveys>. [cited  
26 662 2023 Mar 24].  
27 663  
28 663  
29 664 69. Kelders SM, Kip H, Greeff J. Psychometric evaluation of the TWente Engagement with  
30 665 Ehealth Technologies Scale (TWEETS): evaluation study. *Journal of medical internet  
31 666 research*. 2020 Oct 9;22(10):e17757. doi: 10.2196/17757  
32  
33  
34  
35  
36  
37  
38  
39  
40  
41  
42  
43  
44  
45  
46  
47  
48  
49  
50  
51  
52  
53  
54  
55  
56  
57  
58  
59  
60

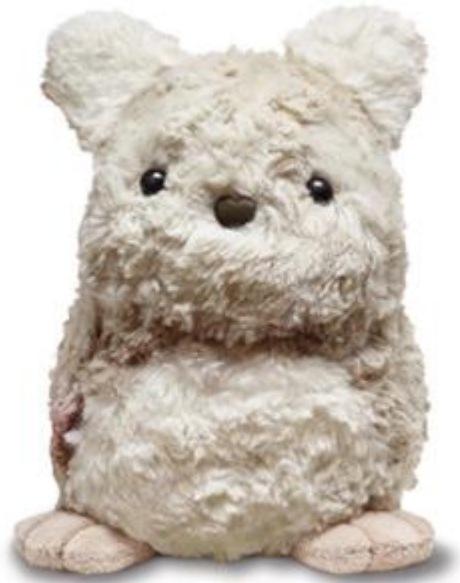

**Figure 1: Purrble – socially assistive robot**

Peer review only

## Supplementary material 1

### ***Purrble logic model***

Purrble operates on 3 levels:

1. Purrble directly provides in-the-moment soothing support in naturally occurring emotional moments when one would attempt to calm down. The physical and interactive design aims to tap into known regulatory factors using the extended Process Model of Emotion Regulation (Gross, 2015). This focuses on two separate stages of the ER process; i) the attentional deployment stage (Aldao et al., 2015; Sheppes & Gross, 2012; Sheppes et al., 2014; Farb et al., 2014) by shifting attention from the emotional situation towards interacting with the device, and ii) the response modulation stage (Beetz et al., 2012; Dore et al., 2017; Reeck et al., 2016; Coan et al., 2006; Crossman et al., 2018; Rabbit et al., 2015) by facilitating down-regulation through pleasant tactical interactions simulating the emotion regulatory effect of human-animal interactions.
2. Mechanisms of Purrble are designed to facilitate long-term engagement, by building on positive subjective experiences of in-the-moment soothing. As the device is framed as an anxious creature needing to be cared for, the key driver is that interactions are framed as helping regulate others' emotions (Dore et al., 2017; Cosley et al., 2010; Taylor, 2011), alongside facilitating a sense of relationship and responsibility for the well-being of the creature (Turkle, 2007; Hayashi & Kato, 2016; Donath, 2004; Lee et al., 2010).
3. Through repeated, soothing, and positive interactions with Purrble over time, it is anticipated that there will be a shift in ER practices and implicit beliefs about emotions (Ford & Gross, 2018), specifically the controllability of one's emotions (Schleider & Weisz, 2016).

## Supplementary material 2

**CONSENT FORM FOR PARTICIPANTS IN RESEARCH PROJECTS**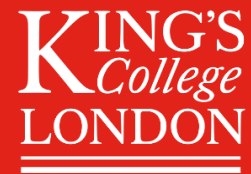

Please complete this form after you have read the Information Sheet and/or listened to an explanation about the research

|                                                                                                                                                                                                                                                                                                                    |                             |
|--------------------------------------------------------------------------------------------------------------------------------------------------------------------------------------------------------------------------------------------------------------------------------------------------------------------|-----------------------------|
| <b>Title of project:</b> An exploratory investigation of the acceptability and feasibility of using an in-situ socially assistive robot with at-risk young people.                                                                                                                                                 |                             |
| <b>Ethical review reference number:</b> 34570                                                                                                                                                                                                                                                                      | <b>Version number:</b> 3-23 |
| Please read and confirm your consent to taking part in this project by initialing all boxes, and signing (by typing your name) below:                                                                                                                                                                              | Tick or initial             |
| 1. I confirm that I have read and understood the information sheet dated 3-23 for the above project. I have had the opportunity to consider the information and asked questions which have been answered to my satisfaction.                                                                                       |                             |
| 2. I consent voluntarily to be a participant in this project and understand that I can refuse to take part and can withdraw from the project at any time, without having to give a reason, up to 2 weeks following my completion of the study.                                                                     |                             |
| 3. I consent to the processing of my personal information for the purposes explained to me in the Information Sheet. I understand that such information will be handled under the terms of UK data protection law, including the UK General Data Protection Regulation (UK GDPR) and the Data Protection Act 2018. |                             |
| 4. I understand that my anonymised information may be subject to review by responsible individuals from the College for monitoring and audit purposes.                                                                                                                                                             |                             |
| 5. I understand that confidentiality and anonymity will be maintained, and it will not be possible to identify me in any research outputs.                                                                                                                                                                         |                             |
| 6. I agree that the researcher/research team may use my data for future research and understand that any such use of identifiable data would be reviewed and approved by a research ethics committee. (In such cases, as with this project, data would not be identifiable in any report).                         |                             |
| 7. I confirm that I am between 16-25 years old, who currently lives in the UK and identifies as any part of the LGBTQ+ umbrella.                                                                                                                                                                                   |                             |
| 8. I understand that I need to provide the name and email address for my support contact (who will only be contacted to i) inform them that you are taking part in a mental health study, and ii) in the event that you can not be reached for a wellbeing check after 3 daily contact attempts via phone/email).  |                             |
| 9. I understand I will be randomised into either an intervention or control group, which impacts when I receive Purrble but irrespective I will be paid for all surveys completed across the 13 week period.                                                                                                       |                             |
| 10. I consent to completing three baseline surveys at the start of the study (weeks 1-3).                                                                                                                                                                                                                          |                             |



|                                                                                                                                                 |  |
|-------------------------------------------------------------------------------------------------------------------------------------------------|--|
| 11. I consent to be contacted via SMS to complete a weekly survey for 13 weeks (including the three baseline surveys).                          |  |
| 12. I consent to be invited to take part in an online interview to discuss my experience of the study.                                          |  |
| 13. I consent to my interview being audio recorded, and shared with a third-party transcriber who will have signed a confidentiality agreement. |  |
| 14. I consent to be invited to take part in a co-designed workshop following the study.                                                         |  |
| 15. I confirm that I am happy to share my contact information as part of the study (name, email, phone number, home address)                    |  |
| 16. I understand that if I take part in the study, I will receive a Purrble through Royal Mail to my home address.                              |  |
| 17. I agree to take part in this project.                                                                                                       |  |

**Name:**

**Email address:**

**Your phone number:**

**Home address:**

\_\_\_\_\_  
**Name of Participant**

\_\_\_\_\_  
**Date**

\_\_\_\_\_  
**Signature**

\_\_\_\_\_  
**Name of Researcher**

\_\_\_\_\_  
**Date**

\_\_\_\_\_  
**Signature**

If you have any questions or require further information, please contact

**Researcher:** A. Jess Williams

**Email:** [amy\\_jess.williams@kcl.ac.uk](mailto:amy_jess.williams@kcl.ac.uk)

**PI:** Petr Slovak

**Email:** [petr.slovak@kcl.ac.uk](mailto:petr.slovak@kcl.ac.uk)

## Supplementary material 3

### **Full Measurement Details**

#### **Primary Outcome Measure**

The primary outcome measure in this study is the Difficulties with Emotion Regulation Scale-8 (DERS8) [60]. This will be given to participants as part of the main assessment at all time-points. The DERS8 contains 8 items which represent affect, thoughts, and actions in response to situations which elicit negative emotions. A single total score is calculated from all items, with higher scores indicating more difficulties with emotion.

#### **Mental Health Measures**

Self-harmful thoughts and behaviours will be assessed using the Self-Harm Questionnaire (SHQ) [63]. At baseline, those who indicate experiences of self-harm behaviour will be invited to complete the second section about historical self-harm behaviour. At all other timepoints, only the three screening questions will be presented; these query the frequency of self-harmful thoughts, suicidal ideation, and self-harmful behaviour. The items are scored individually from “no thoughts/behaviour” to “yes, five or more times”. The wording for these items will be adapted from “have you ever...” to “in the last week/month” (depending on assessment point).

Anxiety symptoms will be assessed using the Generalised Anxiety Disorder-7 (GAD-7) [64]. This is a seven-item instrument, used to identify or assess the severity of generalised anxiety disorder. Each item asks the individual to rate the severity of their symptoms over the time period. The total score is calculated by summing all items and ranges from 0-21. Higher scores indicate more severe levels of anxiety symptoms. The wording for these items will be adapted from “over the last two weeks” to “in the last week/month” (depending on assessment point).

Depressive symptoms will be assessed using the Patient Health Questionnaire-9 (PHQ9) [65]. Across nine items, this instrument measures the severity of depressive symptoms, the total score being calculated by summing all items with responses ranging from 0-27. Higher scores indicate greater depressive severity. Again, the wording for these items will be adapted from “over the last two weeks” to “in the last week/month” (depending on assessment point).

#### **Proximal & Mechanistic Measures**

All proximal and mechanistic measures will only be asked at three timepoints (T0, T5, T10), this is to reduce participant burden and encourage engagement, while also obtaining exploratory data to understand the impact of access to Purrble in greater detail. All additional measures total to 18 extra items, adding ~7 minutes to the assessment.

The Process Model of Emotion Regulation Questionnaire [66] is a 45-item measure which considers 10 ER strategies across the five stages of the Process Model of ER, and particularly how these strategies are used to decrease negative emotions. We will include 2 subscales

1  
2  
3 focusing on attention deployment (focusing elsewhere (4 items) and cognitive distraction (5  
4 items)). Each subscale is scored by taking the average of item-level responses.  
5  
6

7 Hopefulness will be assessed using the State Hope Scale [67]. This is a six-item instrument  
8 concerning ongoing goal-directed thinking (agency and pathways). The total score (6-48) is  
9 calculated by summing responses, with higher scores relating to greater state hopefulness.  
10

11 Loneliness is assessed using the 3-item UCLA loneliness scale for children [68] to consider  
12 participants' subjective loneliness. Items are summed to create a total score (3-12), whereby  
13 higher results indicate greater loneliness.  
14  
15

### 16 ***Engagement Measures***

17  
18 Engagement with Purrble will be assessed using two measures; a bespoke survey [59] and an  
19 adapted version of Twente Engagement with eHealth Technologies Scale (TWEETS) [69].  
20 These will be deployed as part of the main assessment for participants allocated to the  
21 intervention group.  
22  
23

24 The bespoke survey [59] enquires about Purrble use and perceived usefulness over four  
25 items. These are analysed separately, with qualitative responses indicating contexts or  
26 situations where Purrble has been found helpful or unhelpful.  
27  
28

29 TWEETS [69] quantitatively measures intervention engagement across nine items. This is split  
30 into subsections considering behaviour, cognitive, and affective engagement. Total scores  
31 range from 0-36, with higher scores indicating greater engagement.  
32  
33  
34  
35  
36  
37  
38  
39  
40  
41  
42  
43  
44  
45  
46  
47  
48  
49  
50  
51  
52  
53  
54  
55  
56  
57  
58  
59  
60

## Supplementary material 4

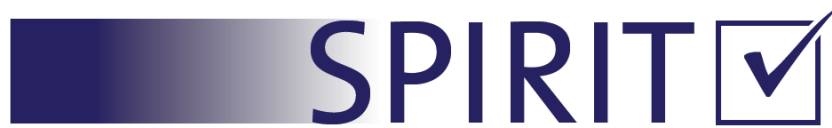

STANDARD PROTOCOL ITEMS: RECOMMENDATIONS FOR INTERVENTIONAL TRIALS

## SPIRIT 2013 Checklist: Recommended items to address in a clinical trial protocol and related documents\*

| Section/item                      | Item No | Description                                                                                                                                                                                                                                                                              | Page and line No   |
|-----------------------------------|---------|------------------------------------------------------------------------------------------------------------------------------------------------------------------------------------------------------------------------------------------------------------------------------------------|--------------------|
| <b>Administrative information</b> |         |                                                                                                                                                                                                                                                                                          |                    |
| Title                             | 1       | Descriptive title identifying the study design, population, interventions, and, if applicable, trial acronym                                                                                                                                                                             | Page 1<br>1-4      |
| Trial registration                | 2a      | Trial identifier and registry name. If not yet registered, name of intended registry                                                                                                                                                                                                     | Page 2<br>44       |
|                                   | 2b      | All items from the World Health Organization Trial Registration Data Set                                                                                                                                                                                                                 | n.a.               |
| Protocol version                  | 3       | Date and version identifier                                                                                                                                                                                                                                                              | n.a.               |
| Funding                           | 4       | Sources and types of financial, material, and other support                                                                                                                                                                                                                              | Page 13<br>399-401 |
| Roles and responsibilities        | 5a      | Names, affiliations, and roles of protocol contributors                                                                                                                                                                                                                                  | Page 1<br>5-13     |
|                                   |         |                                                                                                                                                                                                                                                                                          | Page 13<br>391-396 |
|                                   | 5b      | Name and contact information for the trial sponsor                                                                                                                                                                                                                                       | Page 13<br>400-401 |
|                                   | 5c      | Role of study sponsor and funders, if any, in study design; collection, management, analysis, and interpretation of data; writing of the report; and the decision to submit the report for publication, including whether they will have ultimate authority over any of these activities | Page 13<br>401-402 |

1  
2  
3  
4  
5  
6  
7  
8  
9  
10  
11  
12  
13  
14  
15  
16  
17  
18  
19  
20  
21  
22  
23  
24  
25  
26  
27  
28  
29  
30  
31  
32  
33  
34  
35  
36  
37  
38  
39  
40  
41  
42  
43  
44  
45  
46  
47  
48  
49  
50  
51  
52  
53  
54  
55  
56  
57  
58  
59  
60

5d Composition, roles, and responsibilities of the coordinating centre, steering committee, endpoint adjudication committee, data management team, and other individuals or groups overseeing the trial, if applicable (see Item 21a for data monitoring committee) n.a.

## Introduction

|                          |    |                                                                                                                                                                                                           |                     |
|--------------------------|----|-----------------------------------------------------------------------------------------------------------------------------------------------------------------------------------------------------------|---------------------|
| Background and rationale | 6a | Description of research question and justification for undertaking the trial, including summary of relevant studies (published and unpublished) examining benefits and harms for each intervention        | Page 2-4<br>55-149  |
|                          | 6b | Explanation for choice of comparators                                                                                                                                                                     | Page 6<br>195-199   |
|                          |    |                                                                                                                                                                                                           | Page 12<br>360-362  |
| Objectives               | 7  | Specific objectives or hypotheses                                                                                                                                                                         | Page 4<br>150-161   |
| Trial design             | 8  | Description of trial design including type of trial (eg, parallel group, crossover, factorial, single group), allocation ratio, and framework (eg, superiority, equivalence, noninferiority, exploratory) | Page 4-5<br>163-178 |

## Methods: Participants, interventions, and outcomes

|                      |     |                                                                                                                                                                                                |                     |
|----------------------|-----|------------------------------------------------------------------------------------------------------------------------------------------------------------------------------------------------|---------------------|
| Study setting        | 9   | Description of study settings (eg, community clinic, academic hospital) and list of countries where data will be collected. Reference to where list of study sites can be obtained             | Page 6-7<br>204-222 |
| Eligibility criteria | 10  | Inclusion and exclusion criteria for participants. If applicable, eligibility criteria for study centres and individuals who will perform the interventions (eg, surgeons, psychotherapists)   | Page 6<br>201-209   |
| Interventions        | 11a | Interventions for each group with sufficient detail to allow replication, including how and when they will be administered                                                                     | Page 5-6<br>179-199 |
|                      | 11b | Criteria for discontinuing or modifying allocated interventions for a given trial participant (eg, drug dose change in response to harms, participant request, or improving/worsening disease) | Page 7<br>234-235   |

|    |                      |     |                                                                                                                                                                                                                                                                                                                                                                                |                                 |
|----|----------------------|-----|--------------------------------------------------------------------------------------------------------------------------------------------------------------------------------------------------------------------------------------------------------------------------------------------------------------------------------------------------------------------------------|---------------------------------|
| 1  |                      |     |                                                                                                                                                                                                                                                                                                                                                                                |                                 |
| 2  |                      |     |                                                                                                                                                                                                                                                                                                                                                                                |                                 |
| 3  |                      |     |                                                                                                                                                                                                                                                                                                                                                                                |                                 |
| 4  |                      | 11c | Strategies to improve adherence to intervention protocols, and any procedures for monitoring adherence (eg, drug tablet return, laboratory tests)                                                                                                                                                                                                                              | Page 8<br>285-287               |
| 5  |                      |     |                                                                                                                                                                                                                                                                                                                                                                                |                                 |
| 6  |                      |     |                                                                                                                                                                                                                                                                                                                                                                                |                                 |
| 7  |                      |     |                                                                                                                                                                                                                                                                                                                                                                                |                                 |
| 8  |                      | 11d | Relevant concomitant care and interventions that are permitted or prohibited during the trial                                                                                                                                                                                                                                                                                  | n.a.                            |
| 9  |                      |     |                                                                                                                                                                                                                                                                                                                                                                                |                                 |
| 10 |                      |     |                                                                                                                                                                                                                                                                                                                                                                                |                                 |
| 11 | Outcomes             | 12  | Primary, secondary, and other outcomes, including the specific measurement variable (eg, systolic blood pressure), analysis metric (eg, change from baseline, final value, time to event), method of aggregation (eg, median, proportion), and time point for each outcome. Explanation of the clinical relevance of chosen efficacy and harm outcomes is strongly recommended | Page 8-10<br>268-292<br>SupMat3 |
| 12 |                      |     |                                                                                                                                                                                                                                                                                                                                                                                |                                 |
| 13 |                      |     |                                                                                                                                                                                                                                                                                                                                                                                |                                 |
| 14 |                      |     |                                                                                                                                                                                                                                                                                                                                                                                |                                 |
| 15 |                      |     |                                                                                                                                                                                                                                                                                                                                                                                |                                 |
| 16 |                      |     |                                                                                                                                                                                                                                                                                                                                                                                |                                 |
| 17 |                      |     |                                                                                                                                                                                                                                                                                                                                                                                |                                 |
| 18 |                      |     |                                                                                                                                                                                                                                                                                                                                                                                |                                 |
| 19 |                      |     |                                                                                                                                                                                                                                                                                                                                                                                |                                 |
| 20 | Participant timeline | 13  | Time schedule of enrolment, interventions (including any run-ins and washouts), assessments, and visits for participants. A schematic diagram is highly recommended (see Figure)                                                                                                                                                                                               | Page 6-7<br>211-244             |
| 21 |                      |     |                                                                                                                                                                                                                                                                                                                                                                                |                                 |
| 22 |                      |     |                                                                                                                                                                                                                                                                                                                                                                                |                                 |
| 23 |                      |     |                                                                                                                                                                                                                                                                                                                                                                                |                                 |
| 24 | Sample size          | 14  | Estimated number of participants needed to achieve study objectives and how it was determined, including clinical and statistical assumptions supporting any sample size calculations                                                                                                                                                                                          | Page 7-8<br>245-267             |
| 25 |                      |     |                                                                                                                                                                                                                                                                                                                                                                                |                                 |
| 26 |                      |     |                                                                                                                                                                                                                                                                                                                                                                                |                                 |
| 27 |                      |     |                                                                                                                                                                                                                                                                                                                                                                                |                                 |
| 28 |                      |     |                                                                                                                                                                                                                                                                                                                                                                                |                                 |
| 29 |                      |     |                                                                                                                                                                                                                                                                                                                                                                                |                                 |
| 30 | Recruitment          | 15  | Strategies for achieving adequate participant enrolment to reach target sample size                                                                                                                                                                                                                                                                                            | Page 6-7<br>211-222             |
| 31 |                      |     |                                                                                                                                                                                                                                                                                                                                                                                |                                 |
| 32 |                      |     |                                                                                                                                                                                                                                                                                                                                                                                |                                 |

### Methods: Assignment of interventions (for controlled trials)

#### Allocation:

|    |                                  |     |                                                                                                                                                                                                                                                                                                                                                          |                   |
|----|----------------------------------|-----|----------------------------------------------------------------------------------------------------------------------------------------------------------------------------------------------------------------------------------------------------------------------------------------------------------------------------------------------------------|-------------------|
| 33 |                                  |     |                                                                                                                                                                                                                                                                                                                                                          |                   |
| 34 |                                  |     |                                                                                                                                                                                                                                                                                                                                                          |                   |
| 35 |                                  |     |                                                                                                                                                                                                                                                                                                                                                          |                   |
| 36 |                                  |     |                                                                                                                                                                                                                                                                                                                                                          |                   |
| 37 | Sequence generation              | 16a | Method of generating the allocation sequence (eg, computer-generated random numbers), and list of any factors for stratification. To reduce predictability of a random sequence, details of any planned restriction (eg, blocking) should be provided in a separate document that is unavailable to those who enrol participants or assign interventions | Page 7<br>224-228 |
| 38 |                                  |     |                                                                                                                                                                                                                                                                                                                                                          |                   |
| 39 |                                  |     |                                                                                                                                                                                                                                                                                                                                                          |                   |
| 40 |                                  |     |                                                                                                                                                                                                                                                                                                                                                          |                   |
| 41 |                                  |     |                                                                                                                                                                                                                                                                                                                                                          |                   |
| 42 |                                  |     |                                                                                                                                                                                                                                                                                                                                                          |                   |
| 43 |                                  |     |                                                                                                                                                                                                                                                                                                                                                          |                   |
| 44 |                                  |     |                                                                                                                                                                                                                                                                                                                                                          |                   |
| 45 | Allocation concealment mechanism | 16b | Mechanism of implementing the allocation sequence (eg, central telephone; sequentially numbered, opaque, sealed envelopes), describing any steps to conceal the sequence until interventions are assigned                                                                                                                                                | Page 7<br>224-228 |
| 46 |                                  |     |                                                                                                                                                                                                                                                                                                                                                          |                   |
| 47 |                                  |     |                                                                                                                                                                                                                                                                                                                                                          |                   |
| 48 |                                  |     |                                                                                                                                                                                                                                                                                                                                                          |                   |
| 49 |                                  |     |                                                                                                                                                                                                                                                                                                                                                          |                   |
| 50 | Implementation                   | 16c | Who will generate the allocation sequence, who will enrol participants, and who will assign participants to interventions                                                                                                                                                                                                                                | Page 7<br>224-231 |
| 51 |                                  |     |                                                                                                                                                                                                                                                                                                                                                          |                   |
| 52 |                                  |     |                                                                                                                                                                                                                                                                                                                                                          |                   |
| 53 |                                  |     |                                                                                                                                                                                                                                                                                                                                                          |                   |
| 54 |                                  |     |                                                                                                                                                                                                                                                                                                                                                          |                   |
| 55 |                                  |     |                                                                                                                                                                                                                                                                                                                                                          |                   |
| 56 |                                  |     |                                                                                                                                                                                                                                                                                                                                                          |                   |
| 57 |                                  |     |                                                                                                                                                                                                                                                                                                                                                          |                   |
| 58 |                                  |     |                                                                                                                                                                                                                                                                                                                                                          |                   |
| 59 |                                  |     |                                                                                                                                                                                                                                                                                                                                                          |                   |
| 60 |                                  |     |                                                                                                                                                                                                                                                                                                                                                          |                   |

|                                 |                    |     |                                                                                                                                                      |                   |
|---------------------------------|--------------------|-----|------------------------------------------------------------------------------------------------------------------------------------------------------|-------------------|
| 1<br>2<br>3<br>4<br>5<br>6<br>7 | Blinding (masking) | 17a | Who will be blinded after assignment to interventions (eg, trial participants, care providers, outcome assessors, data analysts), and how            | Page 7<br>224-231 |
| 8<br>9<br>10<br>11              |                    | 17b | If blinded, circumstances under which unblinding is permissible, and procedure for revealing a participant's allocated intervention during the trial | n.a.              |

### Methods: Data collection, management, and analysis

|                                                                                                    |                         |     |                                                                                                                                                                                                                                                                                                                                                                                                              |                                                                |
|----------------------------------------------------------------------------------------------------|-------------------------|-----|--------------------------------------------------------------------------------------------------------------------------------------------------------------------------------------------------------------------------------------------------------------------------------------------------------------------------------------------------------------------------------------------------------------|----------------------------------------------------------------|
| 12<br>13<br>14<br>15<br>16<br>17<br>18<br>19<br>20<br>21<br>22<br>23<br>24<br>25<br>26<br>27<br>28 | Data collection methods | 18a | Plans for assessment and collection of outcome, baseline, and other trial data, including any related processes to promote data quality (eg, duplicate measurements, training of assessors) and a description of study instruments (eg, questionnaires, laboratory tests) along with their reliability and validity, if known. Reference to where data collection forms can be found, if not in the protocol | Page 4-5<br>163-178<br><br>Page 7-10<br>245-292<br><br>SupMat3 |
| 29<br>30<br>31<br>32<br>33<br>34<br>35<br>36<br>37<br>38<br>39                                     |                         | 18b | Plans to promote participant retention and complete follow-up, including list of any outcome data to be collected for participants who discontinue or deviate from intervention protocols                                                                                                                                                                                                                    | n.a.                                                           |
| 40<br>41<br>42<br>43<br>44<br>45<br>46<br>47<br>48<br>49                                           | Data management         | 19  | Plans for data entry, coding, security, and storage, including any related processes to promote data quality (eg, double data entry; range checks for data values). Reference to where details of data management procedures can be found, if not in the protocol                                                                                                                                            | Digital Youth<br>management<br>agreement                       |
| 50<br>51<br>52<br>53<br>54<br>55<br>56<br>57<br>58<br>59<br>60                                     | Statistical methods     | 20a | Statistical methods for analysing primary and secondary outcomes. Reference to where other details of the statistical analysis plan can be found, if not in the protocol                                                                                                                                                                                                                                     | Page 11-12<br>307-357                                          |
|                                                                                                    |                         | 20b | Methods for any additional analyses (eg, subgroup and adjusted analyses)                                                                                                                                                                                                                                                                                                                                     | Page 11-12<br>327-336<br><br>352-357                           |
|                                                                                                    |                         | 20c | Definition of analysis population relating to protocol non-adherence (eg, as randomised analysis), and any statistical methods to handle missing data (eg, multiple imputation)                                                                                                                                                                                                                              | n.a.                                                           |

### Methods: Monitoring

|    |                                 |     |                                                                                                                                                                                                                                                                                                                                       |
|----|---------------------------------|-----|---------------------------------------------------------------------------------------------------------------------------------------------------------------------------------------------------------------------------------------------------------------------------------------------------------------------------------------|
| 1  |                                 |     |                                                                                                                                                                                                                                                                                                                                       |
| 2  |                                 |     |                                                                                                                                                                                                                                                                                                                                       |
| 3  |                                 |     |                                                                                                                                                                                                                                                                                                                                       |
| 4  | Data monitoring                 | 21a | Composition of data monitoring committee (DMC); summary of its role and reporting structure; statement of whether it is independent from the sponsor and competing interests; and reference to where further details about its charter can be found, if not in the protocol. Alternatively, an explanation of why a DMC is not needed |
| 5  |                                 |     | Page 13                                                                                                                                                                                                                                                                                                                               |
| 6  |                                 |     | 400-403                                                                                                                                                                                                                                                                                                                               |
| 7  |                                 |     |                                                                                                                                                                                                                                                                                                                                       |
| 8  |                                 |     |                                                                                                                                                                                                                                                                                                                                       |
| 9  |                                 |     |                                                                                                                                                                                                                                                                                                                                       |
| 10 |                                 |     |                                                                                                                                                                                                                                                                                                                                       |
| 11 |                                 | 21b | Description of any interim analyses and stopping guidelines, including who will have access to these interim results and make the final decision to terminate the trial                                                                                                                                                               |
| 12 |                                 |     | n.a.                                                                                                                                                                                                                                                                                                                                  |
| 13 |                                 |     |                                                                                                                                                                                                                                                                                                                                       |
| 14 |                                 |     |                                                                                                                                                                                                                                                                                                                                       |
| 15 |                                 |     |                                                                                                                                                                                                                                                                                                                                       |
| 16 | Harms                           | 22  | Plans for collecting, assessing, reporting, and managing solicited and spontaneously reported adverse events and other unintended effects of trial interventions or trial conduct                                                                                                                                                     |
| 17 |                                 |     | Page 7                                                                                                                                                                                                                                                                                                                                |
| 18 |                                 |     | 237-244                                                                                                                                                                                                                                                                                                                               |
| 19 |                                 |     |                                                                                                                                                                                                                                                                                                                                       |
| 20 |                                 |     | SupMat5                                                                                                                                                                                                                                                                                                                               |
| 21 | Auditing                        | 23  | Frequency and procedures for auditing trial conduct, if any, and whether the process will be independent from investigators and the sponsor                                                                                                                                                                                           |
| 22 |                                 |     | n.a.                                                                                                                                                                                                                                                                                                                                  |
| 23 |                                 |     |                                                                                                                                                                                                                                                                                                                                       |
| 24 |                                 |     |                                                                                                                                                                                                                                                                                                                                       |
| 25 |                                 |     |                                                                                                                                                                                                                                                                                                                                       |
| 26 | <b>Ethics and dissemination</b> |     |                                                                                                                                                                                                                                                                                                                                       |
| 27 |                                 |     |                                                                                                                                                                                                                                                                                                                                       |
| 28 | Research ethics approval        | 24  | Plans for seeking research ethics committee/institutional review board (REC/IRB) approval                                                                                                                                                                                                                                             |
| 29 |                                 |     | Page 12-13                                                                                                                                                                                                                                                                                                                            |
| 30 |                                 |     | 367-369                                                                                                                                                                                                                                                                                                                               |
| 31 | Protocol amendments             | 25  | Plans for communicating important protocol modifications (eg, changes to eligibility criteria, outcomes, analyses) to relevant parties (eg, investigators, REC/IRBs, trial participants, trial registries, journals, regulators)                                                                                                      |
| 32 |                                 |     | Page 13                                                                                                                                                                                                                                                                                                                               |
| 33 |                                 |     | 375-381                                                                                                                                                                                                                                                                                                                               |
| 34 |                                 |     |                                                                                                                                                                                                                                                                                                                                       |
| 35 |                                 |     |                                                                                                                                                                                                                                                                                                                                       |
| 36 |                                 |     |                                                                                                                                                                                                                                                                                                                                       |
| 37 | Consent or assent               | 26a | Who will obtain informed consent or assent from potential trial participants or authorised surrogates, and how (see Item 32)                                                                                                                                                                                                          |
| 38 |                                 |     | Page 7                                                                                                                                                                                                                                                                                                                                |
| 39 |                                 |     | 224-225                                                                                                                                                                                                                                                                                                                               |
| 40 |                                 |     |                                                                                                                                                                                                                                                                                                                                       |
| 41 |                                 |     | Page 12-13                                                                                                                                                                                                                                                                                                                            |
| 42 |                                 |     | 369-372                                                                                                                                                                                                                                                                                                                               |
| 43 |                                 |     |                                                                                                                                                                                                                                                                                                                                       |
| 44 |                                 | 26b | Additional consent provisions for collection and use of participant data and biological specimens in ancillary studies, if applicable                                                                                                                                                                                                 |
| 45 |                                 |     | n.a.                                                                                                                                                                                                                                                                                                                                  |
| 46 |                                 |     |                                                                                                                                                                                                                                                                                                                                       |
| 47 |                                 |     |                                                                                                                                                                                                                                                                                                                                       |
| 48 | Confidentiality                 | 27  | How personal information about potential and enrolled participants will be collected, shared, and maintained in order to protect confidentiality before, during, and after the trial                                                                                                                                                  |
| 49 |                                 |     | SupMat2                                                                                                                                                                                                                                                                                                                               |
| 50 |                                 |     |                                                                                                                                                                                                                                                                                                                                       |
| 51 |                                 |     |                                                                                                                                                                                                                                                                                                                                       |
| 52 | Declaration of interests        | 28  | Financial and other competing interests for principal investigators for the overall trial and each study site                                                                                                                                                                                                                         |
| 53 |                                 |     | Page 13-14                                                                                                                                                                                                                                                                                                                            |
| 54 |                                 |     | 404-410                                                                                                                                                                                                                                                                                                                               |
| 55 |                                 |     |                                                                                                                                                                                                                                                                                                                                       |
| 56 |                                 |     |                                                                                                                                                                                                                                                                                                                                       |
| 57 |                                 |     |                                                                                                                                                                                                                                                                                                                                       |
| 58 |                                 |     |                                                                                                                                                                                                                                                                                                                                       |
| 59 |                                 |     |                                                                                                                                                                                                                                                                                                                                       |
| 60 |                                 |     |                                                                                                                                                                                                                                                                                                                                       |



|    |                               |     |                                                                                                                                                                                                                                                                                     |                    |
|----|-------------------------------|-----|-------------------------------------------------------------------------------------------------------------------------------------------------------------------------------------------------------------------------------------------------------------------------------------|--------------------|
| 1  |                               |     |                                                                                                                                                                                                                                                                                     |                    |
| 2  |                               |     |                                                                                                                                                                                                                                                                                     |                    |
| 3  |                               |     |                                                                                                                                                                                                                                                                                     |                    |
| 4  | Access to data                | 29  | Statement of who will have access to the final trial dataset, and disclosure of contractual agreements that limit such access for investigators                                                                                                                                     | Page 14<br>412-415 |
| 5  |                               |     |                                                                                                                                                                                                                                                                                     |                    |
| 6  |                               |     |                                                                                                                                                                                                                                                                                     |                    |
| 7  |                               |     |                                                                                                                                                                                                                                                                                     |                    |
| 8  | Ancillary and post-trial care | 30  | Provisions, if any, for ancillary and post-trial care, and for compensation to those who suffer harm from trial participation                                                                                                                                                       | n.a.               |
| 9  |                               |     |                                                                                                                                                                                                                                                                                     |                    |
| 10 |                               |     |                                                                                                                                                                                                                                                                                     |                    |
| 11 |                               |     |                                                                                                                                                                                                                                                                                     |                    |
| 12 | Dissemination policy          | 31a | Plans for investigators and sponsor to communicate trial results to participants, healthcare professionals, the public, and other relevant groups (eg, via publication, reporting in results databases, or other data sharing arrangements), including any publication restrictions | Page 13<br>375-381 |
| 13 |                               |     |                                                                                                                                                                                                                                                                                     |                    |
| 14 |                               |     |                                                                                                                                                                                                                                                                                     |                    |
| 15 |                               |     |                                                                                                                                                                                                                                                                                     |                    |
| 16 |                               |     |                                                                                                                                                                                                                                                                                     |                    |
| 17 |                               |     |                                                                                                                                                                                                                                                                                     |                    |
| 18 |                               |     |                                                                                                                                                                                                                                                                                     |                    |
| 19 |                               | 31b | Authorship eligibility guidelines and any intended use of professional writers                                                                                                                                                                                                      | n.a.               |
| 20 |                               |     |                                                                                                                                                                                                                                                                                     |                    |
| 21 |                               |     |                                                                                                                                                                                                                                                                                     |                    |
| 22 |                               | 31c | Plans, if any, for granting public access to the full protocol, participant-level dataset, and statistical code                                                                                                                                                                     | n.a.               |
| 23 |                               |     |                                                                                                                                                                                                                                                                                     |                    |
| 24 |                               |     |                                                                                                                                                                                                                                                                                     |                    |
| 25 |                               |     |                                                                                                                                                                                                                                                                                     |                    |
| 26 | <b>Appendices</b>             |     |                                                                                                                                                                                                                                                                                     |                    |
| 27 | Informed consent materials    | 32  | Model consent form and other related documentation given to participants and authorised surrogates                                                                                                                                                                                  | SupMat2            |
| 28 |                               |     |                                                                                                                                                                                                                                                                                     |                    |
| 29 |                               |     |                                                                                                                                                                                                                                                                                     |                    |
| 30 | Biological specimens          | 33  | Plans for collection, laboratory evaluation, and storage of biological specimens for genetic or molecular analysis in the current trial and for future use in ancillary studies, if applicable                                                                                      | n.a.               |
| 31 |                               |     |                                                                                                                                                                                                                                                                                     |                    |
| 32 |                               |     |                                                                                                                                                                                                                                                                                     |                    |
| 33 |                               |     |                                                                                                                                                                                                                                                                                     |                    |
| 34 |                               |     |                                                                                                                                                                                                                                                                                     |                    |
| 35 |                               |     |                                                                                                                                                                                                                                                                                     |                    |

\*It is strongly recommended that this checklist be read in conjunction with the SPIRIT 2013 Explanation & Elaboration for important clarification on the items. Amendments to the protocol should be tracked and dated. The SPIRIT checklist is copyrighted by the SPIRIT Group under the Creative Commons "[Attribution-NonCommercial-NoDerivs 3.0 Unported](https://creativecommons.org/licenses/by-nc-nd/3.0/)" license.

## Supplementary material 5

### **Safeguarding Procedures**

The safeguarding procedures will be presented to potential participants in the information sheet before they consent to the study. These were codesigned and agreed with Sprouting Minds, based on previous studies conducted with young people with self-harmful experiences [1-3]. To support young people's safety during the study, the following measures will be instituted:

1. Before starting the study, all participants are required to attend an individual study briefing. At this point, they are taken through the study outline, invited to ask questions, and asked to create a safety plan [4] with the support of a specially trained researcher. Safety planning is quick to complete, is tangible to participants and has been shown to be effective at reducing self-harmful thoughts and behaviours [5]. Participants keep this safety plan containing their individualised strategies for their personal use beyond the life of the study. During the wellbeing check, participants are asked to reflect on their safety plan if they feel distressed at any other point during the study. This follows safety protocols used in other studies by the researcher [1-3].
2. During the briefing, participants will need to nominate a support contact (parent, friend over 18 years, GP, etc), with the understanding that if they do not respond to reactive safeguarding (which can be triggered for each of the main assessments), this person will be contacted to ensure that the participant is safe.
  - a. This nominated person will be contacted (via email) to inform them that the participant is taking part in a mental health study and that we will reach out if we are unable to contact the participant following indication that they are at increased risk.
3. All assessments will include signposting to additional supports (e.g., Young Minds, Samaritans, Papyrus) as well as encouraging participants to seek help from their GP if they are distressed.
4. All assessments will include a visual scale to rate mood pre- and post- completing the survey (1 - very distressed - 10 extremely happy). This is to examine whether the assessment process has an impact, positively or negatively, on the participant. Such assessments have been successfully used in prior self-harm research by the research team members as an indicator of assessment impact [36].
5. Participants in need of support will be identified by checking their responses to the main battery of assessments, within 24 hours. If participants respond that they have had experiences of self-harmful or suicidal thoughts and self-harm behaviour, as well as showing a that the assessment has had a negative impact, they receive a wellbeing call the following day between 1pm-4pm. This allows enough time for the researcher to identify participant risk and inform the PI.
  - a. If the participant does not pick up the phone, they will be contacted via email, asking about their wellbeing, whether they wish to continue with the study, and to arrange a time convenient to complete a wellbeing check. During the wellbeing check, the researcher will be empathic to the difficulties of the participant. The participant will be asked whether they wish to continue the study and, if so, they

1  
2  
3 will update their safety plan with the researcher. If participants do not wish to  
4 continue the study, they will be allowed to withdraw with no consequences. They  
5 will be invited to interview to discuss their thoughts, opinions and experiences of  
6 the study. This would also ask about why they withdrew from the study.  
7

- 8 b. If a participant still does not respond to the email, the same procedure will be  
9 attempted twice more. If there is still no contact from the participant by day 4,  
10 their support contact (nominated during briefing) will be contacted.  
11

12 Alongside this, all researchers who undertake briefing (including safety planning) and wellbeing  
13 calls will be invited to take part in group supervision sessions once a week during data collection  
14 with leading authors. This will be a confidential, safe space to discuss researchers' wellbeing  
15 and mental health, with support for any difficulties which may surface.  
16  
17  
18  
19

## 20 21 **References**

- 22 1. Williams AJ, Arcelus J, Townsend E, Michail M. Feasibility and acceptability of  
23 experience sampling among LGBTQ+ young people with self-harmful thoughts and  
24 behaviours. *Frontiers in psychiatry*. 2022 Aug 17;13:916164.  
25 [Doi.org/10.3389/fpsy.2022.916164](https://doi.org/10.3389/fpsy.2022.916164)  
26 2. Williams AJ, Arcelus J, Townsend E, Michail M. Understanding the processes underlying  
27 self-harm ideation and behaviors within LGBTQ+ young people: A qualitative study.  
28 *Archives of suicide research*. 2021 Apr 3;27(2):380-96.  
29 [doi.org/10.1080/13811118.2021.2003273](https://doi.org/10.1080/13811118.2021.2003273)  
30 3. Williams, AJ, Townsend, T, Naeche, N, Chapman-Nisar, A, Hollis, C, Slovak, P.  
31 Investigating the feasibility, acceptability and appropriation of a socially assistive robot  
32 among minority youth at-risk of self-harm. [in prep]  
33 4. Stanley B, Brown GK. Safety planning intervention: a brief intervention to mitigate  
34 suicide risk. *Cognitive and behavioral practice*. 2012 May 1;19(2):256-64.  
35 [doi.org/10.1016/j.cbpra.2011.01.001](https://doi.org/10.1016/j.cbpra.2011.01.001)  
36 5. Nuij C, van Ballegooijen W, De Beurs D, Juniar D, Erlangsen A, Portzky G, O'Connor  
37 RC, Smit JH, Kerkhof A, Riper H. Safety planning-type interventions for suicide  
38 prevention: meta-analysis. *The British Journal of Psychiatry*. 2021 Aug;219(2):419-26.  
39 [doi.org/10.1192/bjp.2021.50](https://doi.org/10.1192/bjp.2021.50)  
40  
41  
42  
43  
44  
45  
46  
47  
48  
49  
50  
51  
52  
53  
54  
55  
56  
57  
58  
59
